# Supplementary material for: Identification of genetic risk factors in the Chinese population implicates a role of immune system in Alzheimer’s disease pathogenesis
Source: PubMed Central journal article supplement — Proc Natl Acad Sci U S A. 2018 Feb 5;115(8):1697–706. doi: 10.1073/pnas.1715554115 (PMC5828602; doi:10.1073/pnas.1715554115), 2018-02-05
Supplement: pnas.1715554115.sapp.pdf [file pnas.1715554115.sapp.pdf]

- 1 **Supporting Information (Supplemental Material and Methods, 5 Supplemental Figures,**
- 2 **14 Supplemental Tables, and Supplemental References)**
- 3

## 4 **Supplemental Material and Methods**

5

### 6 **Alzheimer’s Disease Neuroimaging Initiative (ADNI) cohort**

7 We obtained genotype, transcriptome, and biomarker data from the Alzheimer’s  
8 Disease Neuroimaging Initiative (ADNI) database ([adni.loni.usc.edu](http://adni.loni.usc.edu)). The ADNI was  
9 launched in 2003 as a public–private partnership and is led by Principal Investigator Michael  
10 W. Weiner, MD. The primary goal of the ADNI is to test whether serial MRI, PET, other  
11 biological markers, and clinical and neuropsychological assessments can be combined to  
12 measure the progression of MCI and AD. Array genotyping data from the ADNI-1 ( $n = 757$ )  
13 and ADNI-GO/2 ( $n = 432$ ) generated from the HumanOmniExpress BeadChip (Illumina) were  
14 adopted for our replication studies, with another dataset derived from whole-genome  
15 sequencing of ADNI subjects ( $n = 808$ ; among whom, 258 overlapped with subjects from  
16 ADNI-1, 427 overlapped with ADNI-GO/2, and 123 were newly recruited subjects). We  
17 determined the phenotypes for the ADNI subjects on the basis of the latest diagnostic records  
18 (updated until July 2016). By combining the subjects from the three datasets, we obtained  
19 genotype information for 1,312 subjects ( $n = 1,312$ ) including 515 AD and 339 NC subjects  
20 (Remaining subjects were in MCI status). ). For blood transcriptome data, please refer to (1)  
21 for details. For cerebrospinal fluid (CSF) and plasma biomarker levels, data were obtained from  
22 the Biomarkers Consortium Projects entitled “Use of Targeted Multiplex Proteomic Strategies  
23 to Identify Novel CSF Biomarkers in AD” and “Use of Targeted Multiplex Proteomic  
24 Strategies to Identify Plasma-Based Biomarkers in Alzheimer’s Disease” accordingly. Please  
25 refer to the corresponding project descriptions for details. ([https://adni.loni.usc.edu/wp-](https://adni.loni.usc.edu/wp-content/uploads/2010/11/BC_Plasma_Proteomics_Data_Primer.pdf)  
26 [content/uploads/2010/11/BC\\_Plasma\\_Proteomics\\_Data\\_Primer.pdf](https://adni.loni.usc.edu/wp-content/uploads/2010/11/BC_Plasma_Proteomics_Data_Primer.pdf); [https://fnih.org/what-we-](https://fnih.org/what-we-do/biomarkers-consortium/programs/alzheimers-targeted-csf-based-proteomics)  
27 [do/biomarkers-consortium/programs/alzheimers-targeted-csf-based-proteomics](https://fnih.org/what-we-do/biomarkers-consortium/programs/alzheimers-targeted-csf-based-proteomics)).

28

### 29 **NIA Alzheimer’s Disease Centers Cohort (ADC)**

30 Genotype and phenotype data were retrieved from the NIH dbGaP (accession number:  
31 phs000372.v2.p1) for an AD cohort comprising 6,065 subjects ( $n = 6,065$ ), with individual  
32 genotypes generated from a Human660W-Quad BeadChip (Illumina) or HumanOmniExpress  
33 Array (Illumina). All autopsied subjects were  $\geq 60$  years old at death. Dementia in AD cases  
34 was determined according to the DSM-IV criteria or a Clinical Dementia Rating (CDR)  $\geq 1$ .

35 Please refer to the corresponding dbGaP project for details (2, 3). We only kept subjects with  
36 a definite diagnosis of AD as well as NCs, finally yielding 5,692 subjects (AD: 3,946, NC:  
37 1,746) for the replication study.

38

### 39 **Late Onset Alzheimer's Disease (LOAD) Family Study**

40 Genotype and phenotype data were retrieved from the NIH dbGaP (accession number:  
41 phs000168.v2.p2), which included four datasets. The genotype information of 5,192 subjects  
42 ( $n = 5,192$ ) from sets No. 1, 3, and 4 (General Research Use, disease-specific [Alzheimer's  
43 disease] and disease-specific [Alzheimer's disease, NPU], respectively) were merged before  
44 the subsequent analysis. Individual genotypes were generated from a 610K Beadchip array  
45 (Illumina). Please refer to the corresponding dbGaP project for details (4). We only kept NCs  
46 or subjects with a definite diagnosis of AD, finally yielding 2,695 subjects (AD: 464, NC:  
47 2,231) for the replication study.

48

### 49 **Filtering and imputation for the array dataset**

50 We converted the array genotype information (ADNI, LOAD, and ADC) from PLINK  
51 file format (5) to VCF file format using VcfCooker (v1.1.1)  
52 (<https://genome.sph.umich.edu/wiki/VcfCooker>) and performed pre-filtering with a sample  
53 call rate  $\geq 95\%$  and an SNP call rate  $\geq 80\%$  for each genotype file. The filtered genotype  
54 information was submitted to the Michigan Imputation Server using EAGEL (v2.3) with  
55 Haplotype Reference Panel (HRC r1.1) for phasing and imputation (6-8) in the form of  
56 chromosome-separated VCF files. Post-filtering was further applied by filtering imputed  
57 variants with imputation  $R^2$ -values  $< 0.3$ .

58

### 59 **Whole-genome sequencing**

60 For WGS, we collected whole blood in non-EDTA tubes and centrifuged them at 2000  
61  $\times g$ . After removing the serum in the supernatant, we used the cell pellet to prepare genomic  
62 DNA. genomic DNA purity was checked by a NanoPhotometer<sup>®</sup> spectrophotometer (Implen),  
63 the concentration was measured using a Qubit<sup>®</sup> DNA Assay Kit with a Qubit<sup>®</sup> 2.0 Fluorometer  
64 (Thermo Fisher Scientific), and fragment size distribution was measured using the DNA Nano  
65 6000 Assay Kit with the Bioanalyzer 2100 system (Agilent). DNA (1.5  $\mu\text{g}$ ) of each sample was

66 fragmented by sonication to 350 bp and used to generate a sequencing library with the Truseq  
67 Nano DNA HT Sample Preparation Kit (Illumina). The genomic DNA libraries were  
68 sequenced. To ensure data quality, adapter contamination and low-quality reads were filtered  
69 from the raw data, producing clean data with a base quality greater than Q20 for most detected  
70 signals; the proportion of Q30 exceeded 80%.

71

## 72 **Microarray-based genotyping**

73 For QC analysis, we used microarray-based genotyping as an independent assay to  
74 verify the SNP call results from low-coverage WGS. We genotyped genomic DNA from 96  
75 out of 1,222 subjects (~8%) using the Axiom<sup>®</sup> Genome-Wide CHB 1 & CHB 2 Array Plate  
76 Set (Affymetrix), which was specifically designed for the Chinese population. Genotyping was  
77 performed on an Illumina array platform (Beijing Genomics Institute). We filtered the results  
78 according to an SNP call rate  $\geq 95\%$  and retained 937,176 concordantly detected bi-allelic  
79 variants with a minor allele frequency (MAF)  $\geq 5\%$  in the WGS dataset for the quality control  
80 assessment.

81

## 82 **Whole genome sequencing (WGS) and variant calling method**

83 For variant detection, the Gotcloud (9) pipeline was adopted to detect variants from our  
84 low-pass WGS data comprising 1,348 samples including 126 re-sequenced samples. Data were  
85 subsequently subjected to *FastQC* (v0.11.2) (10) for quality checking and *Trimmomatic* (v  
86 0.32) (11) for the trimming and filtering of low-quality reads (*LEADING:3 TRAILING:3*  
87 *SLIDINGWINDOW:4:15 MINLEN:40 ILLUMINACLIP: 2:30:10*). Clean data were mapped to  
88 the GRCh37 reference genome containing the decoy fragments (hs37d5.fa) using *BWA -mem*  
89 (v 0.7.12-r1039). After de-duplication and clipping of the overlapped pair-end reads, BAM  
90 files were subjected to *samtools-hybrid* (v0.1.7-hybrid [r510 + r983]), a specialized version of  
91 *samtools*, to generate glf files, which store the marginal likelihoods for genotypes (*-q 20 -F*  
92 *0x0704* for filtering of low mapping quality and PCR duplication). glfFlex was adopted for the  
93 population-based SNP calling (*-p 0.9 --minMapQuality 0 --maxDepth 100000 --uniformTsTv,*  
94 *--smartFilter*), with a total of 24,742,555 single nucleotide variants obtained after variant  
95 calling. We applied hard-filtering methods implemented in the Gotcloud pipeline as *VcfCooker*  
96 (v1.1.1) to filter low-confidant variant calls on the basis of multiple metrics such as distance  
97 with known insertion/deletion sites (*--winIndel 5* using insertion deletion information obtained

98 from Mills and 1000G gold standard indels file), allele balance (*--maxABL 70*), and mapping  
99 quality (*--minMQ 20 --minQual 5*). We subjected variants with high-confidence calls in the  
100 range of minor allele frequency (MAF)  $\geq 5\%$  ( $n = 5,523,365$ ; 22.3% of raw detected sites,  
101 5,369,369 of which were in autosomal chromosomes) to Beagle (r1399) (12, 13) for phasing  
102 (*phase-its = 30*) and imputation (*impute-its = 15*) using the genotype likelihood information in  
103 chromosome-separated VCF files (*gl* flag).

104

### 105 **Quality control assessment of variant detection**

106 To assess the accuracy of variant detection, we re-sequenced 126 out of 1,222 samples  
107 (10.3% of all samples) using the same WGS protocol, together with 96 samples (7.9% of total  
108 samples) genotyped using the Axiom<sup>®</sup> Genome-Wide CHB 1 & CHB 2 Array Plate Set  
109 (Affymetrix). We obtained genomic DNA for quality control assessment from separate  
110 aliquots. We merged the re-sequenced samples into the whole cohort for SNP detection,  
111 phasing, and imputation. We used VCFtools (v0.1.14) (14) together with R programing to  
112 extract site information and subgrouped the autosomal variants according to average  
113 sequencing coverage (DP) and MAF. We stored genotype information in VCF format and  
114 subjected the information to *GATK GenotypeConcordance* (v3.4-46-gbc02625) to compare  
115 genotypes from two datasets. We calculated metrics for quality assessment including non-  
116 reference sensitivity (NRS), non-reference discrepancy (NRD), and overall concordance rate  
117 (CR) as follows:

118

$$119 \quad NRS = \frac{\# \text{ true positive}}{\# \text{ true polymorphic}}$$

$$120 \quad NRD = 1 - \frac{\# \text{ HOM\_VAR\_HOM\_VAR} + \# \text{ HET\_HET}}{\text{total excluding } \# \text{ HOM\_REF\_HOM\_REF}}$$

$$121 \quad CR = \frac{\# \text{ concordant genotypes}}{\# \text{ genotypes}}$$

122 We excluded the samples with re-sequenced discordant rate  $>5\%$ . We performed  
123 sample quality control for gender consistency, and excluded related samples, removed  
124 population outlier using principal component analysis and confirmed our population structure  
125 using 1000 Genomes data. We filtered out the SNPs that failed in Hardy–Weinberg equilibrium

126 (HWE) in controls ( $p < 1 \times 10^{-5}$ ).

127

### 128 **Gender missingness or inconsistency**

129 We converted phased and imputed genotype information from the WGS data of 1,222  
130 samples into PLINK binary pedigree format and subjected it to PLINK (v1.9) *--check-sex* to  
131 estimate gender using genetic information from common variants in the X chromosome on the  
132 basis of calculated inbreeding coefficients ( $n = 153,276$  for variants in the X chromosome).  
133 We excluded 16 samples (NC: 8, MCI: 5, AD: 2) from the data owing to a lack of gender  
134 information or inconsistency between sequencing data and clinical records.

135

### 136 **Principal component analysis for outlier removal and correction of population structure**

137 We subjected the remaining 1,206 samples to EIGENSOFT (v7.2.1) *smartpca* (15, 16)  
138 for principal component analysis to evaluate possible stratification rendered by admixed  
139 populations or batch effects during sequencing. We subjected genotype information from  
140 pruned autosomal SNPs (using PLINK *--indep-pairwise 50 5 0.2*, yielding 319,892 generated  
141 sites) to *smartpca* with a cutoff of six standard deviations and 10 iterations of outlier removal.  
142 As a result, we excluded 32 samples (NC: 22, MCI: 2, AD: 8) owing to deviation from main  
143 populations. We also used EIGENSOFT *smartpca* to generate principal components to correct  
144 for possible confounding factors in the combined dataset (i.e., the in-house cohort and the  
145 CONVERGE population control) during the association test.

146

### 147 **Sample relatedness**

148 We further subjected the remaining 1,174 samples to PLINK to examine sample  
149 relatedness using the pairwise identity-by-state (IBS) distance generated by PLINK *--matrix*.  
150 We set an IBS distance (IBD)  $> 0.1875$  as a threshold, which is halfway between the expected  
151 IBD for third- and second-degree relatives. We excluded two samples (AD: 1, NC: 1) from the  
152 data and kept the remaining 1,172 samples (NC: 442, MCI: 253, AD: 477) for the association  
153 analysis.

154

### 155 **Population structure and estimation of ethnic attributes**

156 We subjected the genotype information obtained from 168,673 pruned concordant calls

157 with an MAF  $\geq 10\%$  in 1,172 Chinese AD WGS subjects together with 2,504 1000 Genomes  
158 Phase 3 data including five super-populations (African [AFR],  $n = 661$ ; European [EUR],  $n =$   
159  $503$ ; East Asian [EAS],  $n = 504$ ; South Asian [SAS],  $n = 489$ ; American [AMR],  $n = 347$ ) to  
160 *fastStructure* (17) ( $K = 5$ ) to infer the ethnic attributes of our in-house data. Meanwhile, we  
161 subjected 5,181,985 concordant calls to PLINK *--pca* to visualize population structure and  
162 attributes in comparison with 1000 Genomes Phase 3 dataset.

163

#### 164 **Filtering of low-confidence SNP calls**

165 During the association test using the PLINK, we controlled for Hardy–Weinberg  
166 equilibrium (HWE) by setting a  $p$ -value threshold of  $1 \times 10^{-5}$  for normal controls from the in-  
167 house WGS and CONVERGE datasets. After obtaining the association results, we assessed the  
168 sites with a discordant call rate  $> 5\%$  (5 of 126 samples) among 126 re-sequenced samples and  
169 filtered them (516,773 sites, 9.62% of autosomal sites with an MAF  $\geq 5\%$ ) to overcome the  
170 possible issues in detection of variants in low-complexity or repetitive regions.

171

#### 172 **TaqMan genotyping for *APOE***

173 For *APOE*- $\epsilon 4$  (rs429358 and rs7412), we performed genotyping by using the TaqMan  
174 assay with probe ordered from Thermo Scientific (assay ID: C\_3084793\_20 and  
175 C\_904973\_10). We subjected 10 ng genomic DNA to real-time PCR on the QuantStudio 7  
176 Flex Real-Time PCR system (Applied Biosystems) and performed genotype calling using  
177 QuanStudio Real-Time PCR software (Applied Biosystems). We used R programming for the  
178 statistical analysis of genotyping results.

179

#### 180 **Genotype expression analysis for candidate sites in transcriptome data**

181 The Genotype-Tissue Expression (GTEx) Project was supported by the Common Fund  
182 of the Office of the Director of the National Institutes of Health, and by NCI, NHGRI, NHLBI,  
183 NIDA, NIMH, and NINDS (18, 19). The data used for the analyses described in this manuscript  
184 were obtained from dbGaP (phs000424.v6.p1). We imputed genotype data using the Michigan  
185 Imputation Server (EAGEL v2.3) with the Haplotype Reference Panel (HRC r1.1) (6-8). For  
186 network analysis, RNA-seq datasets from blood ( $n = 365$ ) and hippocampal tissues ( $n = 87$ )  
187 were included, and low-abundance genes (average Reads Per Kilobase of transcript per Million

188 mapped reads [RPKM] < 1 in corresponding tissues) were filtered out prior to the analysis. For  
189 the global genotype–expression analysis, 52 variants (*GCHI*: 1, *KCNJ15*: 2, *APOE* locus: 49)  
190 that passed the nominal  $p$ -value threshold of  $5E-08$  during the stage 1+2 analysis and were  
191 concordantly detected in the imputed GTEx dataset were subjected to robust linear regression  
192 using R *robustbase* packages, further adjusting for the first three principal components, age,  
193 and gender. The expression levels (i.e., RPKM) for each gene across individuals with the same  
194 tissue samples were normalized by the rank-based inverse normal transformation (INT) method  
195 using the *rntransform* function in the R *GenABEL* package (20) to overcome the possible  
196 outliers. We filtered out gene-SNP association pairs with raw  $p$ -value > 0.05. Then, for each  
197 of the three loci, we obtained the top 100 genes (based on gene-level  $p$ -values, where a gene-  
198 level  $p$ -value is the smallest  $p$ -value from all SNPs tested in the locus) for network analysis.  
199 We finally reported the enriched gene ontology terms in the obtained network on the basis of  
200 a false-discovery rate (FDR) < 0.05. The regulatory network was visualized by using the R  
201 *ggnet2* package. For *GCHI*, RNA-seq data obtained from the brain caudate region ( $n = 94$ )  
202 was included for the genotype-expression association test using ANCOVA (analysis of  
203 covariance) model with age, gender and top-3 principal components.

204

### 205 **Genotype-expression analysis of plasma and cerebrospinal fluid biomarker data for** 206 **candidate sites**

207 For plasma biomarkers retrieved from ADNI, markers with signals below the detection  
208 limit were filtered out before the association analysis. Genotype-expression analysis was first  
209 conducted by robust regression with the inclusion of age, gender and top-5 PCs as covariates  
210 to initial screen for possible hints in AD subjects. Biomarkers passed statistical significance  
211 threshold of  $p = 0.05$  were recorded as potential candidates and ranked by  $p$ -value (from lowest  
212 to highest). For top-3 plasma biomarkers for *KCNJ15* and *GCH1*, the biomarker levels (in  
213  $\log_{10}$  scale) were converted to the actual concentration values, with IQR filtering being applied  
214 to remove the outlier within individuals from same genotype and phenotype groups (values  
215 below  $Q1 - 1.5 \times IQR$  or above  $Q3 + 1.5 \times IQR$  were excluded) [Q1: first quartile; Q3: third  
216 quartile; IQR: inter-quartile range =  $Q3 - Q1$ ]. Then clean data were subjected to ANCOVA  
217 model adjusting for age, gender and top-5 PCs with Bonferroni correction for further  
218 examination of possible regulation of biomarker levels between different phenotypes and



219 genotypes (within each genotypes the differences between AD and normal controls were tested;  
220 within each phenotypes the differences in biomarkers level between genotypes were tested by  
221 setting the homozygous reference groups as reference controls).  
222

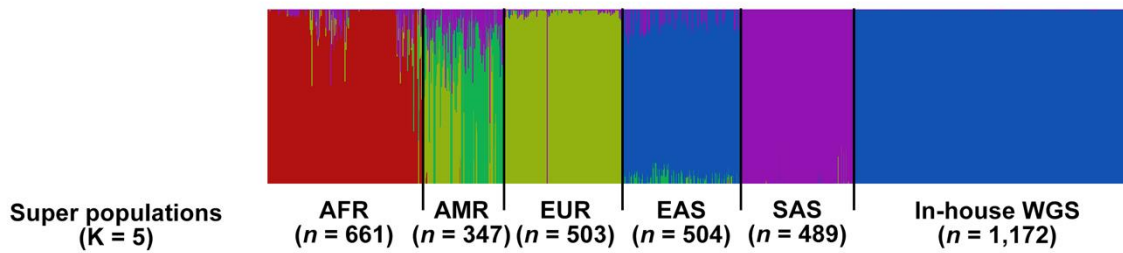

223  
 224  
 225  
 226  
 227  
 228  
 229  
 230  
 231  
 232  
 233  
 234  
 235  
 236  
 237

**Figure S1. Mapping the ethnic attributes of the Chinese WGS cohort using the 1000 Genomes Super-population information.** Genomic information from 2,504 1000 Genomes phase 3 individuals across 5 super-populations was used as a reference to infer the ethnic attributes of 1,172 in-house Chinese WGS samples. A total of 168,673 pruned ( $R^2 < 0.2$ ) bi-allelic SNPs with an MAF  $\geq 10\%$  in in-house WGS data that were concordantly detected in the 1000 Genomes data were subjected to fastSTRUCTURE for clustering. Each subject is represented by a vertical line further partitioned into colored segments; lengths represent the admixture proportions from 5 clusters, with colors specifying the corresponding ethnic attributes. The results suggest that our in-house WGS data (dominantly shown in blue) fit into the EAS cluster (also dominantly shown in blue). AFR, African; AMR, American; EUR, European; EAS, East Asian; SAS, South Asian; MAF, minor allele frequency; SNP, single nucleotide polymorphism; WGS, whole-genome sequencing.

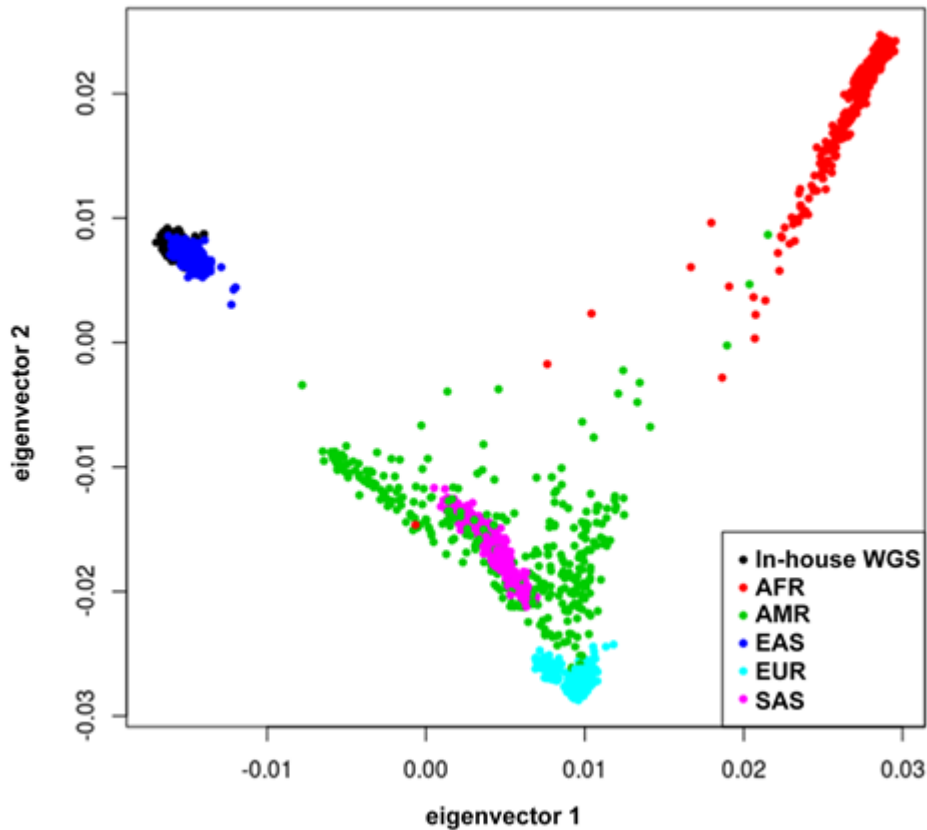

238  
239

240 **Figure S2. Mapping the ethnic attributes of the Chinese WGS cohort using the 1000**  
 241 **Genomes Super-population information: Principal component analysis (PCA).** Genomic  
 242 information from 2,504 1000 Genomes Phase 3 individuals across 5 super-populations was  
 243 used as a reference to infer the ethnic attributes of 1,172 in-house WGS samples. A total of  
 244 5,181,985 bi-allelic SNPs with an MAF  $\geq 5\%$  in the WGS concordantly detected in the 1000  
 245 Genomes data were subjected to PCA. The X- and Y-axes denote PC1 and PC2 obtained from  
 246 the PCA, respectively. Each dot in the figure represents one individual, and colors specify  
 247 attributes. The plot suggests that our in-house WGS data (black) fit into the EAS supercluster  
 248 (blue), as indicated by the overlap of these 2 populations. AFR, African; AMR, American;  
 249 EUR, European; EAS, East Asian; SAS, South Asian; SNP, single nucleotide polymorphism;  
 250 MAF, minor allele frequency; WGS, whole-genome sequencing; PCA, principal component  
 251 analysis.

252

253  
254  
255  
256  
257

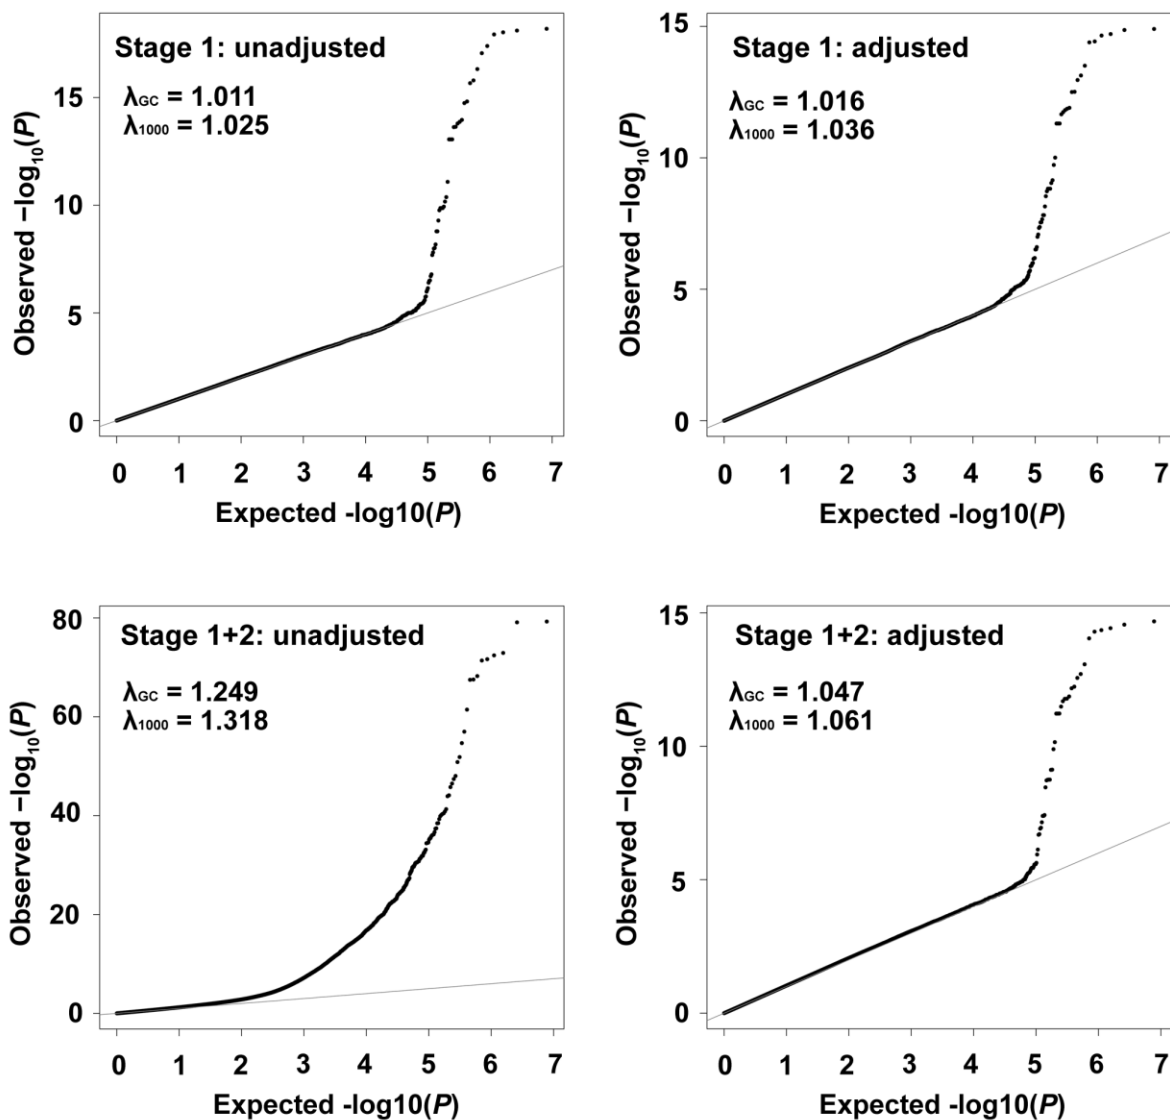

258  
259  
260  
261  
262  
263  
264

**Figure S3. Quantile–quantile plot of the GWAS results of the WGS dataset.** Quantile–quantile plot showing the  $p$ -value distribution for the stage 1 and stage 1+2 analyses before and after adjusting for age, gender, and phenotype-associated PCs. Values of genomic inflation factor ( $\lambda_{GC}$ ) and factor for an equivalent study of 1000 cases and 1000 controls ( $\lambda_{1000}$ ) are indicated (1.011 and 1.025 for  $\lambda_{GC}$  and  $\lambda_{1000}$ , respectively). GWAS, genome-wide association study; WGS, whole-genome sequencing.

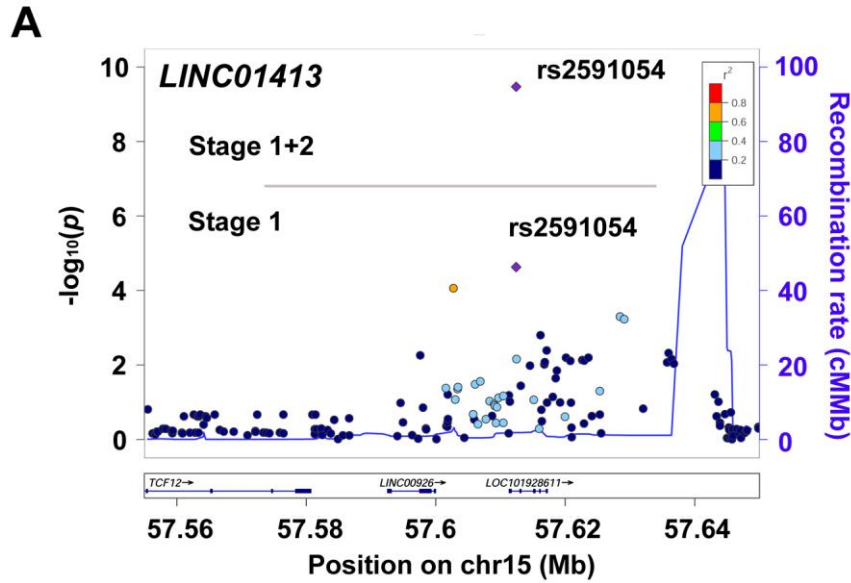

**B**  
rs2591054 (*LINC01413*)

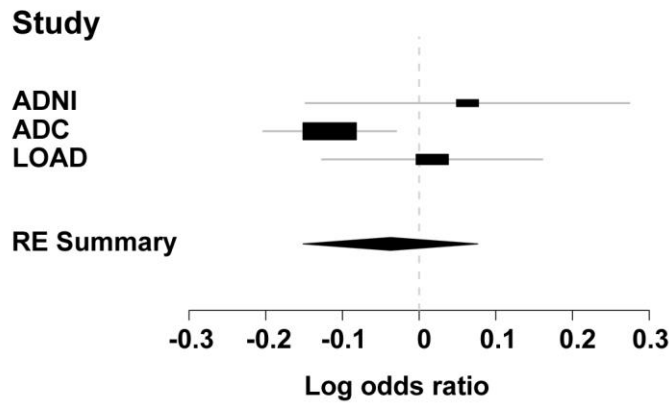

265  
266

267 **Figure S4. Genetic evidence for the association between *LINC01413* (rs2591054) and AD.**

268 (A) LocusZoom plots showing the association results of sentinel variant rs2591054 and other  
 269 variants in the *LINC01413* locus. The X-axis denotes the genomic coordinate, and the Y-axis  
 270 denotes the nominal  $p$ -value in  $\log_{10}$  scale. The color map indicates the LD measurement ( $R^2$ )  
 271 for each variant in reference to the sentinel variant (rs2591054, marked by purple diamonds).  
 272 Signals below and above the grey horizontal line were obtained from the association analysis  
 273 results from stage 1 and the combined dataset (stage1+2), respectively. (B) Forest plots  
 274 representing the meta-analysis results of rs2591054 in the three previously published GWAS  
 275 AD cohorts. Values of effect size (log odds ratio) obtained from independent datasets or meta-  
 276 results are denoted by squares and diamonds, respectively. For the independent dataset, lines  
 277 indicate the range of the 95% confidence intervals, and the sizes of squares are proportional to  
 278 the weights used in the meta-analysis. For the meta-analysis results, the widths of the diamonds  
 279 cover the range of the 95% confidence intervals. *LINC01413* rs2591054: random effect  $p$ -value  
 280 =  $5.19E-1$ , effect size =  $-0.0375$ . ADNI (AD: 515, NC: 339), ADC (AD: 3,946, NC: 1,746),  
 281 and LOAD (AD: 464, NC: 2,231). ADNI, Alzheimer's Disease Neuroimaging Initiative; ADC,  
 282 Alzheimer's Disease Centers Cohort; LOAD, Late-onset Alzheimer's disease Family Study.  
 283 RE, random effect.

284

A

$lm(\text{formula} = \text{KCNJ15} \sim \text{rs928771} \times \text{DX} + \text{AGE} + \text{PTGENDER} + \text{PC1} + \text{PC2} + \text{PC3} + \text{PC4} + \text{PC5})$

| Coefficients:  |          |            |         |            |
|----------------|----------|------------|---------|------------|
|                | Estimate | Std. Error | t value | p-value    |
| (Intercept)    | 7.417    | 0.364      | 20.398  | < 2.00E-16 |
| rs928771       | -0.155   | 0.052      | -2.995  | 2.94E-03   |
| DX_AD          | 0.362    | 0.111      | 3.251   | 1.27E-03   |
| AGE            | 0.011    | 0.005      | 2.358   | 1.89E-02   |
| PTGENDER_Male  | -0.169   | 0.062      | -2.750  | 6.28E-03   |
| PC1            | -4.385   | 1.020      | -4.297  | 2.27E-05   |
| PC2            | -1.477   | 1.101      | -1.341  | 1.81E-01   |
| PC3            | 2.199    | 1.078      | 2.041   | 4.20E-02   |
| PC4            | 1.966    | 0.982      | 2.003   | 4.60E-02   |
| PC5            | 1.797    | 1.808      | 0.994   | 3.21E-01   |
| rs928771:DX_AD | -0.128   | 0.091      | -1.408  | 1.60E-01   |

B

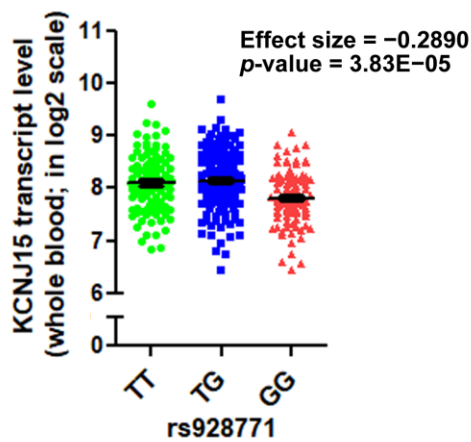

C

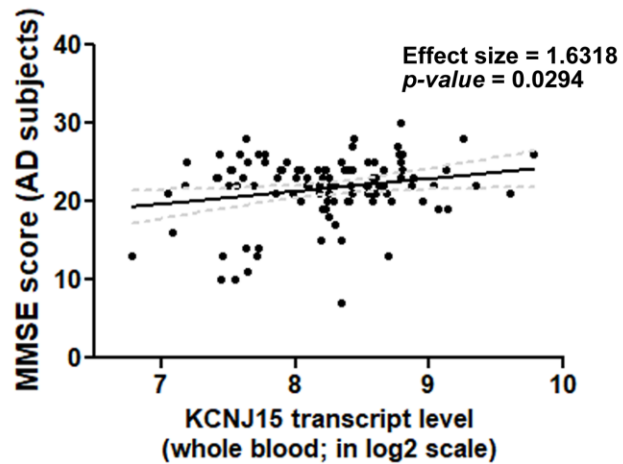

285  
286

287 **Figure S5. Extended data for genotype- and phenotype-associated modulations of**  
 288 **KCNJ15 transcript level in the blood.** (A) Table summary for possible effects of interactions  
 289 between *KCNJ15* rs928771 genotypes and AD. Linear regression model taking the KCNJ15  
 290 transcript level as outcome and genotype, phenotype together with the interaction term  
 291 (genotype×phenotype) as input adjusting for age, gender and top 5 PCs. Model formula:  
 292  $lm(KCNJ15 \sim rs928771 + phenotype + (rs928771 \times phenotype) + age + gender + PC[1-5])$  ( $n$   
 293 = 244 and 106 for NC and AD subjects, respectively). (B) Association between KCNJ15  
 294 transcript level in the blood and KCNJ15 rs928771 genotypes in the MCI subjects ( $n = 101,$   
 295 164, 104 for MCI subjects harboring zero, one or two copies of rs928771 G alleles); linear  
 296 regression model,  $p$ -value = 3.83E-05, effect size = -0.2890. (C) Association between  
 297 cognitive performance (indicated by Mini-Mental State Examination [MMSE] score) and  
 298 KCNJ15 rs928771 genotypes in the AD subjects ( $n = 28, 49, 29$  for AD subjects harboring  
 299 zero, one or two copies of rs928771 G allele).

300

301 **Table S1. Cohort information.** A total of 1,222 participants including 489 with AD ( $n = 489$ ),  
 302 260 with MCI ( $n = 260$ ), and 473 corresponding age- and gender-matched NCs ( $n = 473$ ) were  
 303 recruited from Huashan hospital for WGS sequencing. Individuals with a history of neurologic  
 304 diseases or psychiatric disorders were excluded. Meanwhile, a multicenter control cohort from  
 305 the CONVERGE study was included for the association analysis (21), and three previously  
 306 published GWAS AD cohorts (ADNI, ADC, and LOAD) were included for *in silico*  
 307 replications (22). WGS, whole-genome sequencing; NC, normal control; MCI, mild cognitive  
 308 impairment; AD, Alzheimer's disease; MMSE, Mini-Mental State Examination; SD, standard  
 309 deviation; ADNI, Alzheimer's Disease Neuroimaging Initiative; ADC, Alzheimer's Disease  
 310 Centers Cohort; CONVERGE, China, Oxford and Virginia Commonwealth University  
 311 Experimental Research on Genetic Epidemiology; LOAD, Late-onset Alzheimer's disease  
 312 Family Study.

313

| In-house subjects                                 | Participants included for WGS<br>( $n = 1,222$ ) |                      |                     |
|---------------------------------------------------|--------------------------------------------------|----------------------|---------------------|
|                                                   | NC<br>( $n = 473$ )                              | MCI<br>( $n = 260$ ) | AD<br>( $n = 489$ ) |
| Female (%)                                        | 249 (53.1%)                                      | 122 (47.2%)          | 263 (53.8%)         |
| Age/years ( $\pm$ SD)                             | 68.2 ( $\pm$ 9.2)                                | 69.7 ( $\pm$ 7.8)    | 69.3 ( $\pm$ 8.9)   |
| APOE- $\epsilon$ 4 carriers (%)                   | 100 (21.1%)                                      | 82 (31.5%)           | 219 (44.8%)         |
| APOE- $\epsilon$ 4 frequency<br>Allele number (%) | 108 (11.4%)                                      | 95 (18.3%)           | 271 (27.7%)         |
| APOE- $\epsilon$ 2 frequency<br>Allele number (%) | 77 (8.1%)                                        | 32 (6.2%)            | 34 (3.5%)           |
| MMSE score ( $\pm$ SD)                            | 28.0 ( $\pm$ 2.4)                                | 26.4 ( $\pm$ 2.0)    | 14.6 ( $\pm$ 6.5)   |

| CONVERGE<br>population controls | All CONVERGE subjects<br>( $n = 10,640$ ) | CONVERGE elderly controls<br>(Age $\geq 55$ , $n = 1,745$ ) |
|---------------------------------|-------------------------------------------|-------------------------------------------------------------|
| Female (%)                      | 100%                                      | 100%                                                        |
| Age/years ( $\pm$ SD)           | 46.0 ( $\pm$ 7.6)                         | 57.1 ( $\pm$ 1.7)                                           |

| Previously published<br>GWAS AD cohorts | ADNI              | ADC               | LOAD               | Total number |
|-----------------------------------------|-------------------|-------------------|--------------------|--------------|
| AD ( $n$ )                              | 515               | 3,946             | 464                | 4,925        |
| NC ( $n$ )                              | 339               | 1,746             | 2,231              | 4,316        |
| Female (%)                              | 388 (45.4%)       | 3,283 (57.6%)     | 1,680 (62.3%)      |              |
| Age/years ( $\pm$ SD)                   | 74.4 ( $\pm$ 6.9) | 77.8 ( $\pm$ 8.3) | 81.2 ( $\pm$ 10.2) |              |

314

315 **Table S2. Quality assessment by comparison with re-sequenced samples ( $n = 126$ ).** Site  
 316 quality assessment was performed by comparing the variant calling of the same individuals  
 317 from 2 WGS datasets. Two datasets in VCF format (i.e., the whole dataset or the dataset after  
 318 subgrouping by average DP or MAF) were subjected to *GATK GenotypeConcordance*. Non-  
 319 reference sensitivity, non-reference discrepancy, and overall genotype concordance were  
 320 calculated to evaluate sequencing quality. DP, coverage; SNP, single nucleotide polymorphism;  
 321 MAF, minor allele frequency; SD, standard deviation; WGS, whole-genome sequencing.

322  
 323 **Subgrouping of sites by average coverage (DP)**

| Average DP range | Non-reference sensitivity (SD) | Non-reference discrepancy (SD) | Overall genotype concordance (SD) |
|------------------|--------------------------------|--------------------------------|-----------------------------------|
| DP < 0.5         | 0.975 (0.002)                  | 0.103 (0.005)                  | 0.905 (0.005)                     |
| DP = 0.5–1       | 0.957 (0.003)                  | 0.150 (0.007)                  | 0.898 (0.005)                     |
| DP = 1–2         | 0.952 (0.003)                  | 0.133 (0.004)                  | 0.922 (0.003)                     |
| DP = 2–3         | 0.973 (0.001)                  | 0.070 (0.002)                  | 0.961 (0.001)                     |
| DP = 3–4         | 0.987 (0.001)                  | 0.036 (0.003)                  | 0.981 (0.002)                     |
| DP = 4–5         | 0.993 (0.001)                  | 0.022 (0.003)                  | 0.988 (0.001)                     |
| DP > 5           | 0.994 (0.001)                  | 0.018 (0.003)                  | 0.991 (0.002)                     |
| All              | 0.989 (0.001)                  | 0.033 (0.003)                  | 0.982 (0.001)                     |

324

325 **Subgrouping of sites by minor allele frequency (MAF)**

| MAF range      | Non-reference sensitivity (SD) | Non-reference discrepancy (SD) | Overall genotype concordance (SD) |
|----------------|--------------------------------|--------------------------------|-----------------------------------|
| MAF = 0.05–0.1 | 0.982 (0.001)                  | 0.040 (0.002)                  | 0.989 (0.001)                     |
| MAF = 0.1–0.2  | 0.985 (0.001)                  | 0.038 (0.002)                  | 0.984 (0.001)                     |
| MAF = 0.2–0.3  | 0.990 (0.001)                  | 0.029 (0.003)                  | 0.983 (0.001)                     |
| MAF = 0.3–0.4  | 0.990 (0.001)                  | 0.031 (0.003)                  | 0.978 (0.002)                     |
| MAF = 0.4–0.5  | 0.991 (0.001)                  | 0.033 (0.003)                  | 0.975 (0.002)                     |
| All            | 0.989 (0.001)                  | 0.033 (0.003)                  | 0.982 (0.001)                     |

326



327 **Table S3. Quality assessment by comparison with genotyping array results ( $n = 96$ ).** Site  
 328 quality assessment was performed by comparing the variant calling in the WGS dataset with  
 329 an array genotyping dataset from the same individuals. Two datasets in VCF format (i.e., the  
 330 whole dataset or the dataset after subgrouping by DP or MAF) were subjected to GATK  
 331 *GenotypeConcordance*. Non-reference sensitivity, non-reference discrepancy, and overall  
 332 genotype concordance were calculated to evaluate sequencing quality. DP, coverage; SNP,  
 333 single nucleotide polymorphism; MAF, minor allele frequency; SD, standard deviation WGS,  
 334 whole-genome sequencing.

335

336 **Subgrouping of sites by average coverage (DP)**

| Average DP range | Non-reference sensitivity (SD) | Non-reference discrepancy (SD) | Overall genotype concordance (SD) |
|------------------|--------------------------------|--------------------------------|-----------------------------------|
| DP < 0.5         | 0.978 (0.066)                  | 0.301 (0.162)                  | 0.779 (0.123)                     |
| DP = 0.5–1       | 0.983 (0.015)                  | 0.075 (0.044)                  | 0.961 (0.026)                     |
| DP = 1–2         | 0.979 (0.008)                  | 0.049 (0.036)                  | 0.978 (0.019)                     |
| DP = 2–3         | 0.981 (0.007)                  | 0.039 (0.034)                  | 0.984 (0.017)                     |
| DP = 3–4         | 0.987 (0.005)                  | 0.029 (0.035)                  | 0.988 (0.017)                     |
| DP = 4–5         | 0.991 (0.003)                  | 0.022 (0.035)                  | 0.991 (0.017)                     |
| DP > 5           | 0.993 (0.003)                  | 0.019 (0.035)                  | 0.992 (0.017)                     |
| All              | 0.991 (0.003)                  | 0.022 (0.034)                  | 0.991 (0.017)                     |

337

338 **Subgrouping of sites by minor allele frequency (MAF)**

| MAF range      | Non-reference sensitivity (SD) | Non-reference discrepancy (SD) | Overall genotype concordance (SD) |
|----------------|--------------------------------|--------------------------------|-----------------------------------|
| MAF = 0.05–0.1 | 0.979 (0.009)                  | 0.036 (0.035)                  | 0.994 (0.007)                     |
| MAF = 0.1–0.2  | 0.987 (0.005)                  | 0.027 (0.036)                  | 0.992 (0.012)                     |
| MAF = 0.2–0.3  | 0.991 (0.003)                  | 0.022 (0.036)                  | 0.990 (0.019)                     |
| MAF = 0.3–0.4  | 0.993 (0.002)                  | 0.020 (0.035)                  | 0.988 (0.023)                     |
| MAF = 0.4–0.5  | 0.995 (0.001)                  | 0.019 (0.032)                  | 0.987 (0.026)                     |
| All            | 0.991 (0.003)                  | 0.022 (0.034)                  | 0.991 (0.017)                     |

339

340 **Table S4. Quality assessment of low-pass sequencing results (*APOE* genotype).** The *APOE*  
 341 genotypes of 1,172 WGS samples were separately generated from low-pass WGS sequencing  
 342 calls and genotyping using TaqMan assays. Site quality assessment was performed by  
 343 comparing those 2 datasets (1 individual was removed because of missing records). Overall  
 344 concordance rate: 0.980; non-reference sensitivity: 0.953; non-reference discrepancy: 0.047.  
 345 Row: genotypes obtained from WGS dataset; column: genotypes obtained from genotyping.  
 346 WGS, whole-genome sequencing.  
 347

| APOE genotype | E2/E2 | E2/E3 | E2/E4 | E3/E3 | E3/E4 | E4/E4 | WGS calls |
|---------------|-------|-------|-------|-------|-------|-------|-----------|
| E2/E2         | 2     | 1     | 0     | 0     | 0     | 0     |           |
| E2/E3         | 1     | 109   | 0     | 2     | 0     | 0     |           |
| E2/E4         | 0     | 2     | 16    | 0     | 0     | 0     |           |
| E3/E3         | 0     | 1     | 1     | 663   | 2     | 0     |           |
| E3/E4         | 0     | 1     | 0     | 8     | 288   | 1     |           |
| E4/E4         | 0     | 0     | 0     | 0     | 4     | 69    |           |
| Genotyping    |       |       |       |       |       |       |           |

348

349 **Table S5. AD susceptibility variants discovered in the validation stage.** Fifty-nine variants  
350 passed the validation stage with a nominal  $p$ -value passing the genome-wide significance  
351 threshold ( $p < 5E-8$ ) in the combined dataset. AD, Alzheimer's disease; CHR, chromosome(s);  
352 BP, base positions in GRCh37 annotation; SNP, single nucleotide polymorphism; EA, effect  
353 allele; EAF, effect allele frequency; NC, normal controls; OR, odds ratio. CONVERGE, China,  
354 Oxford and Virginia Commonwealth University Experimental Research on Genetic  
355 Epidemiology; 1KG: 1000 Genomes Phase 3 cohort; gnomAD, Genome Aggregation  
356 Database; EAS, East Asian.  
357

| CHR | BP       | SNP        | Nearest Genes* | EA | EAF_AD | Stage-1<br>(AD: 477 NC: 442) |                       |      | Combined dataset<br>(AD: 477 NC: 2187) |                       |      | EAF<br>CON<br>ERGE | EAF<br>1KG<br>EAS | EAF<br>gnomAD<br>EAS |
|-----|----------|------------|----------------|----|--------|------------------------------|-----------------------|------|----------------------------------------|-----------------------|------|--------------------|-------------------|----------------------|
|     |          |            |                |    |        | EAF                          | Nominal<br>$p$ -value | OR   | EAF                                    | Nominal<br>$p$ -value | OR   |                    |                   |                      |
| 14  | 55297043 | rs72713460 | GCH1           | T  | 0.160  | 0.097                        | 5.9E-05               | 1.77 | 0.099                                  | 4.0E-08               | 1.74 | 0.125              | 0.129             | 0.120                |
| 15  | 57612410 | rs2591054  | LINC01413      | C  | 0.683  | 0.773                        | 1.8E-05               | 0.64 | 0.779                                  | 3.5E-10               | 0.61 | 0.719              | 0.754             | 0.755                |
| 19  | 45371168 | rs4803766  | PVRL2          | A  | 0.468  | 0.360                        | 2.8E-06               | 1.56 | 0.332                                  | 3.0E-15               | 1.76 | 0.340              | 0.394             | 0.386                |
| 19  | 45372794 | rs404935   | PVRL2          | A  | 0.280  | 0.154                        | 6.8E-11               | 2.14 | 0.145                                  | 5.8E-24               | 2.30 | 0.144              | 0.147             | 0.150                |
| 19  | 45373565 | rs395908   | PVRL2          | A  | 0.273  | 0.149                        | 1.2E-10               | 2.13 | 0.143                                  | 1.9E-22               | 2.25 | 0.144              | 0.144             | 0.151                |
| 19  | 45376284 | rs519113   | PVRL2          | G  | 0.297  | 0.166                        | 4.2E-11               | 2.12 | 0.130                                  | 3.5E-37               | 2.83 | 0.152              | 0.163             | 0.168                |
| 19  | 45378144 | rs34278513 | PVRL2          | T  | 0.262  | 0.145                        | 5.2E-10               | 2.10 | 0.137                                  | 9.0E-22               | 2.24 | 0.126              | 0.132             | 0.147                |
| 19  | 45379516 | rs412776   | PVRL2          | A  | 0.277  | 0.146                        | 8.3E-12               | 2.24 | 0.136                                  | 1.2E-26               | 2.43 | 0.129              | 0.127             | 0.145                |
| 19  | 45380961 | rs3865427  | PVRL2          | A  | 0.256  | 0.137                        | 1.7E-10               | 2.17 | 0.128                                  | 2.2E-23               | 2.34 | 0.125              | 0.126             | 0.140                |
| 19  | 45380970 | rs11668861 | PVRL2          | T  | 0.672  | 0.775                        | 8.6E-07               | 0.59 | 0.794                                  | 3.7E-16               | 0.53 | 0.787              | 0.775             | 0.761                |
| 19  | 45382034 | rs6859     | PVRL2          | G  | 0.585  | 0.692                        | 1.7E-06               | 0.63 | 0.759                                  | 9.7E-28               | 0.45 | 0.696              | 0.692             | 0.688                |
| 19  | 45382966 | rs3852860  | PVRL2          | T  | 0.661  | 0.758                        | 5.5E-06               | 0.62 | 0.780                                  | 8.4E-15               | 0.55 | 0.778              | 0.765             | 0.761                |
| 19  | 45383061 | rs3852861  | PVRL2          | T  | 0.667  | 0.761                        | 7.5E-06               | 0.63 | 0.783                                  | 2.0E-14               | 0.55 | 0.778              | 0.765             | 0.763                |
| 19  | 45383079 | rs71352237 | PVRL2          | C  | 0.254  | 0.135                        | 1.4E-10               | 2.19 | 0.121                                  | 6.0E-26               | 2.47 | 0.119              | 0.124             | 0.128                |
| 19  | 45383115 | rs34224078 | PVRL2          | G  | 0.254  | 0.135                        | 1.4E-10               | 2.19 | 0.120                                  | 2.2E-26               | 2.49 | 0.119              | 0.124             | 0.129                |
| 19  | 45383139 | rs35879138 | PVRL2          | A  | 0.254  | 0.135                        | 1.4E-10               | 2.19 | 0.120                                  | 2.2E-26               | 2.49 | 0.119              | 0.124             | 0.128                |
| 19  | 45387459 | rs12972156 | PVRL2          | G  | 0.243  | 0.110                        | 8.8E-14               | 2.61 | 0.096                                  | 4.5E-36               | 3.02 | 0.092              | 0.095             | 0.098                |
| 19  | 45387596 | rs12972970 | PVRL2          | A  | 0.243  | 0.110                        | 8.8E-14               | 2.61 | 0.096                                  | 6.4E-36               | 3.01 | 0.093              | 0.095             | 0.098                |
| 19  | 45388130 | rs34342646 | PVRL2          | A  | 0.243  | 0.110                        | 8.8E-14               | 2.61 | 0.097                                  | 9.1E-36               | 3.00 | 0.093              | 0.095             | 0.100                |
| 19  | 45388500 | rs283811   | PVRL2          | G  | 0.312  | 0.196                        | 1.0E-08               | 1.87 | 0.184                                  | 9.2E-19               | 2.01 | 0.178              | 0.203             | 0.194                |
| 19  | 45388568 | rs283812   | PVRL2          | C  | 0.362  | 0.231                        | 9.1E-10               | 1.89 | 0.165                                  | 4.0E-43               | 2.87 | 0.156              | NA                | 0.006                |
| 19  | 45390333 | rs283815   | PVRL2          | G  | 0.319  | 0.203                        | 1.6E-08               | 1.84 | 0.188                                  | 3.8E-19               | 2.02 | 0.184              | 0.214             | 0.194                |
| 19  | 45392254 | rs6857     | PVRL2          | T  | 0.248  | 0.111                        | 2.3E-14               | 2.65 | 0.096                                  | 1.8E-38               | 3.11 | 0.094              | 0.100             | 0.097                |
| 19  | 45394336 | rs71352238 | TOMM40         | C  | 0.247  | 0.109                        | 1.1E-14               | 2.70 | 0.096                                  | 1.0E-37               | 3.08 | 0.094              | 0.097             | 0.098                |
| 19  | 45394969 | rs184017   | TOMM40         | G  | 0.318  | 0.203                        | 2.1E-08               | 1.83 | 0.185                                  | 7.8E-20               | 2.05 | 0.181              | 0.208             | 0.198                |
| 19  | 45395266 | rs157580   | TOMM40         | A  | 0.550  | 0.448                        | 1.2E-05               | 1.51 | 0.415                                  | 2.5E-14               | 1.72 | 0.430              | 0.459             | 0.443                |
| 19  | 45395619 | rs2075650  | TOMM40         | G  | 0.245  | 0.109                        | 2.4E-14               | 2.67 | 0.096                                  | 2.8E-37               | 3.07 | 0.094              | 0.097             | 0.087                |
| 19  | 45395714 | rs157581   | TOMM40         | C  | 0.361  | 0.236                        | 6.7E-09               | 1.82 | 0.208                                  | 5.6E-24               | 2.15 | 0.220              | 0.246             | 0.228                |
| 19  | 45395909 | rs34404554 | TOMM40         | G  | 0.246  | 0.109                        | 1.6E-14               | 2.68 | 0.096                                  | 1.0E-37               | 3.09 | 0.094              | 0.097             | 0.099                |
| 19  | 45396144 | rs11556505 | TOMM40         | T  | 0.245  | 0.108                        | 1.4E-14               | 2.70 | 0.096                                  | 2.8E-37               | 3.07 | 0.094              | 0.096             | 0.087                |
| 19  | 45396219 | rs157582   | TOMM40         | T  | 0.322  | 0.204                        | 9.7E-09               | 1.86 | 0.188                                  | 5.7E-20               | 2.05 | 0.182              | 0.209             | 0.186                |
| 19  | 45396665 | rs59007384 | TOMM40         | T  | 0.321  | 0.215                        | 3.3E-07               | 1.73 | 0.184                                  | 4.6E-21               | 2.09 | 0.189              | 0.227             | 0.208                |
| 19  | 45404691 | rs405697   | TOMM40         | G  | 0.512  | 0.411                        | 1.5E-05               | 1.50 | 0.387                                  | 1.3E-12               | 1.66 | 0.392              | 0.436             | 0.418                |
| 19  | 45406673 | rs10119    | TOMM40         | A  | 0.280  | 0.119                        | 8.8E-18               | 2.88 | 0.098                                  | 1.7E-51               | 3.57 | 0.097              | 0.096             | 0.102                |
| 19  | 45409167 | rs440446   | APOE           | G  | 0.508  | 0.407                        | 1.4E-05               | 1.51 | 0.381                                  | 4.3E-13               | 1.68 | 0.383              | 0.428             | 0.396                |
| 19  | 45410002 | rs769449   | APOE           | A  | 0.252  | 0.104                        | 2.2E-16               | 2.89 | 0.089                                  | 8.1E-45               | 3.42 | 0.086              | 0.077             | 0.090                |
| 19  | 45411941 | rs429358   | APOE           | C  | 0.278  | 0.113                        | 9.5E-19               | 3.02 | 0.083                                  | 4.1E-64               | 4.25 | 0.093              | 0.086             | 0.089                |
| 19  | 45413576 | rs75627662 | APOE           | T  | 0.306  | 0.200                        | 2.0E-07               | 1.76 | 0.191                                  | 3.4E-15               | 1.87 | 0.185              | 0.191             | 0.189                |
| 19  | 45414451 | rs439401   | APOE           | C  | 0.535  | 0.427                        | 3.6E-06               | 1.55 | 0.407                                  | 4.9E-13               | 1.68 | 0.407              | 0.444             | 0.414                |
| 19  | 45415713 | rs10414043 | Intergenic     | A  | 0.269  | 0.114                        | 4.8E-17               | 2.86 | 0.108                                  | 2.4E-39               | 3.04 | 0.104              | 0.088             | 0.100                |
| 19  | 45415935 | rs7256200  | APOC1          | T  | 0.266  | 0.114                        | 1.6E-16               | 2.81 | 0.107                                  | 6.6E-39               | 3.04 | 0.104              | 0.085             | 0.097                |
| 19  | 45416178 | rs483082   | APOC1          | T  | 0.332  | 0.207                        | 1.6E-09               | 1.91 | 0.195                                  | 1.4E-20               | 2.06 | 0.191              | 0.202             | 0.193                |
| 19  | 45416478 | rs584007   | APOC1          | G  | 0.531  | 0.429                        | 1.1E-05               | 1.51 | 0.402                                  | 2.8E-13               | 1.69 | 0.407              | 0.447             | 0.416                |
| 19  | 45416741 | rs438811   | APOC1          | T  | 0.332  | 0.207                        | 1.6E-09               | 1.91 | 0.195                                  | 1.4E-20               | 2.06 | 0.192              | 0.202             | 0.194                |
| 19  | 45418790 | rs5117     | APOC1          | C  | 0.308  | 0.201                        | 1.6E-07               | 1.77 | 0.185                                  | 2.0E-17               | 1.96 | 0.181              | 0.205             | 0.189                |
| 19  | 45418961 | rs3826688  | APOC1          | C  | 0.531  | 0.430                        | 1.3E-05               | 1.50 | 0.402                                  | 2.8E-13               | 1.69 | 0.397              | 0.454             | 0.422                |

|    |          |                 |            |   |       |       |         |      |       |         |      |       |       |       |
|----|----------|-----------------|------------|---|-------|-------|---------|------|-------|---------|------|-------|-------|-------|
| 19 | 45420082 | rs73052335      | APOC1      | C | 0.325 | 0.153 | 7.1E-18 | 2.67 | 0.101 | 3.5E-72 | 4.27 | 0.112 | NA    | 0.094 |
| 19 | 45421254 | rs12721046      | APOC1      | A | 0.296 | 0.126 | 6.5E-19 | 2.92 | 0.105 | 1.8E-53 | 3.57 | 0.116 | 0.097 | 0.111 |
| 19 | 45421877 | rs484195        | APOC1      | G | 0.533 | 0.424 | 3.4E-06 | 1.55 | 0.396 | 8.1E-15 | 1.74 | 0.404 | 0.460 | 0.416 |
| 19 | 45422160 | rs12721051      | APOC1      | G | 0.296 | 0.127 | 1.2E-18 | 2.89 | 0.118 | 2.1E-44 | 3.15 | 0.116 | 0.099 | 0.098 |
| 19 | 45422846 | rs56131196      | APOC1      | A | 0.297 | 0.127 | 7.8E-19 | 2.91 | 0.117 | 2.4E-45 | 3.19 | 0.116 | 0.099 | 0.113 |
| 19 | 45422946 | rs4420638       | APOC1      | G | 0.293 | 0.127 | 4.1E-18 | 2.85 | 0.118 | 4.8E-43 | 3.10 | 0.116 | 0.099 | 0.114 |
| 19 | 45425175 | rs157594        | Intergenic | G | 0.533 | 0.427 | 5.5E-06 | 1.53 | 0.393 | 2.0E-15 | 1.76 | 0.336 | 0.454 | 0.415 |
| 19 | 45425460 | rs157595        | Intergenic | G | 0.535 | 0.428 | 4.5E-06 | 1.54 | 0.396 | 3.5E-15 | 1.75 | 0.399 | 0.463 | 0.414 |
| 19 | 45427125 | rs11178933<br>1 | Intergenic | A | 0.269 | 0.121 | 1.5E-15 | 2.68 | 0.113 | 1.4E-36 | 2.91 | 0.112 | 0.092 | 0.104 |
| 19 | 45428234 | rs66626994      | APOC1P1    | A | 0.270 | 0.122 | 1.8E-15 | 2.66 | 0.112 | 3.7E-37 | 2.93 | 0.108 | 0.091 | 0.105 |
| 19 | 45429708 | rs60049679      | APOC1P1    | C | 0.245 | 0.154 | 1.0E-06 | 1.79 | 0.109 | 2.0E-29 | 2.67 | 0.115 | 0.129 | 0.151 |
| 21 | 39663760 | rs928771        | KCNJ15     | G | 0.238 | 0.154 | 6.0E-06 | 1.72 | 0.161 | 1.2E-08 | 1.63 | 0.172 | 0.125 | 0.172 |
| 21 | 39664976 | rs2836293       | KCNJ15     | A | 0.235 | 0.154 | 1.2E-05 | 1.69 | 0.161 | 4.5E-08 | 1.60 | 0.172 | 0.125 | 0.172 |

358 \* For the *APOE* region, the nearest genes located within  $\pm 2$  kb of the listed SNPs

359

360 **Table S6. Examination of covariates effects in stage 1 analysis.** Commonly used covariates  
 361 in the genome-wide association study, including age, gender, and principal components, were  
 362 tested in the stage 1 analysis. Upper panel: statistical metrics of Spearman's correlation test  
 363 between the newly identified candidate alleles and covariates (i.e., age and gender) in stage 1  
 364 subjects ( $n = 442$  and  $477$ , for NC and AD respectively). Lower panel: logistic regression of  
 365 the risk effects of the variants with or without adjustment for principal components (the top  
 366 five that were phenotype-independent), age, and gender ( $n = 442$ ,  $477$  for NC and AD,  
 367 respectively). Rho, Spearman's rank correlation coefficient; PC, principal components; SE,  
 368 standard error; OR, odds ratio.

369  
 370

| Gene      | Variant       | Age     |                 | Gender  |                 |
|-----------|---------------|---------|-----------------|---------|-----------------|
|           |               | Rho     | <i>p</i> -value | Rho     | <i>p</i> -value |
| GCH1      | 14:55297043_T | -0.0055 | 0.8677          | -0.0619 | 0.0604          |
| LINC01413 | 15:57612410_C | -0.0573 | 0.0821          | -0.0332 | 0.3142          |
| KCNJ15    | 21:39663760_G | -0.0137 | 0.6779          | 0.0104  | 0.7513          |

371  
 372

| Gene      | Variant       | <i>p</i> -value<br>(unadjusted) | <i>p</i> -value<br>(age+gender) | <i>p</i> -value<br>(top 5 PCs<br>+age+gender) | Effect<br>size | SE     | OR   |
|-----------|---------------|---------------------------------|---------------------------------|-----------------------------------------------|----------------|--------|------|
| GCH1      | 14:55297043_T | 6.93E-05                        | 6.53E-05                        | 6.31E-05                                      | 0.5877         | 0.1469 | 1.80 |
| LINC01413 | 15:57612410_C | 2.59E-05                        | 3.80E-05                        | 3.50E-05                                      | -0.4507        | 0.1089 | 0.64 |
| KCNJ15    | 21:39663760_G | 2.25E-05                        | 1.91E-05                        | 9.81E-06                                      | 0.5371         | 0.1215 | 1.71 |

373  
 374

375 **Table S7. Examination of covariates effects in stage 1+2 analysis.** Commonly used  
 376 covariates in the genome-wide association study, including age, gender, and batch effects were  
 377 tested in the stage 1+2 analysis. Upper panel: Spearman's correlation test between the newly  
 378 identified candidate alleles and covariates (i.e., age, gender, and batch effects) in stage 1+2  
 379 control subjects, which comprised both in-house controls ( $n = 442$ ) and CONVERGE elderly  
 380 controls ( $n = 1,745$ ). Lower panel: summary metrics for logistic regression before and after  
 381 adjusting age and gender as covariates. Rho, Spearman's rank correlation coefficient; SE,  
 382 standard error; OR, odds ratio.  
 383

| Gene      | Variant       | Age     |                 | Gender  |                 | Batch   |                 |
|-----------|---------------|---------|-----------------|---------|-----------------|---------|-----------------|
|           |               | Rho     | <i>p</i> -value | Rho     | <i>p</i> -value | Rho     | <i>p</i> -value |
| GCH1      | 14:55297043_T | -0.0146 | 0.4953          | -0.0259 | 0.2259          | -0.0043 | 0.8395          |
| LINC01413 | 15:57612410_C | -0.0130 | 0.5434          | -0.0077 | 0.7188          | 0.0134  | 0.5308          |
| KCNJ15    | 21:39663760_G | -0.0176 | 0.4110          | 0.0127  | 0.5519          | 0.0138  | 0.5189          |

384

| Gene      | Variant       | <i>p</i> -value<br>(unadjusted) | <i>p</i> -value<br>(age+gender) | Effect size | SE     | OR   |
|-----------|---------------|---------------------------------|---------------------------------|-------------|--------|------|
| GCH1      | 14:55297043_T | 1.55E-07                        | 1.49E-05                        | 0.5199      | 0.1201 | 1.68 |
| LINC01413 | 15:57612410_C | 8.89E-10                        | 2.45E-06                        | -0.4463     | 0.0947 | 0.64 |
| KCNJ15    | 21:39663760_G | 9.21E-08                        | 5.99E-07                        | 0.5139      | 0.1030 | 1.67 |

385

386

387 **Table S8. Correction for population stratification in stage 1+2 analysis.** Summary metrics  
 388 of the association results before and after adjustment for population stratification. Upper panel:  
 389 summary metrics after application of the genetic similarity score matching (GSM) method with  
 390 the conditional logistic regression model before and after adjustment for age and gender. Lower  
 391 panel: summary metrics for logistic regression after inclusion of phenotype-associated  
 392 principal components (PC1 and PC3, at a nominal level of  $p < 0.05$ ), with further adjustment  
 393 for age and gender. GSM, genetic similarity score matching; SE, standard error; OR, odds ratio;  
 394 PC, principal component.

395  
396

| Gene      | Variant       | <i>p</i> -value (unadjusted) | <i>p</i> -value (GSM) | Effect size | SE     | OR    | <i>p</i> -value (GSM +age+gender) | Effect size | SE     | OR    |
|-----------|---------------|------------------------------|-----------------------|-------------|--------|-------|-----------------------------------|-------------|--------|-------|
| GCH1      | 14:55297043_T | 1.55E-07                     | 2.45E-07              | 0.5214      | 0.1010 | 1.684 | 1.55E-04                          | 0.5046      | 0.1334 | 1.657 |
| LINC01413 | 15:57612410_C | 8.89E-10                     | 3.68E-10              | -0.5042     | 0.0804 | 0.604 | 3.32E-05                          | -0.4197     | 0.1011 | 0.657 |
| KCNJ15    | 21:39663760_G | 9.21E-08                     | 3.23E-08              | 0.4866      | 0.0880 | 1.627 | 1.49E-06                          | 0.5385      | 0.1119 | 1.714 |

397  
398

| Gene      | Variant       | <i>p</i> -value (unadjusted) | <i>p</i> -value (PC 1, 3) | Effect size | SE     | OR    | <i>p</i> -value (PC 1, 3 +age+gender) | Effect size | SE     | OR   |
|-----------|---------------|------------------------------|---------------------------|-------------|--------|-------|---------------------------------------|-------------|--------|------|
| GCH1      | 14:55297043_T | 1.55E-07                     | 4.42E-05                  | 0.5910      | 0.1447 | 1.806 | 4.36E-05                              | 0.5944      | 0.1454 | 1.81 |
| LINC01413 | 15:57612410_C | 8.89E-10                     | 2.21E-05                  | -0.4578     | 0.1079 | 0.633 | 3.65E-05                              | -0.4467     | 0.1082 | 0.64 |
| KCNJ15    | 21:39663760_G | 9.21E-08                     | 4.22E-06                  | 0.5487      | 0.1193 | 1.731 | 3.60E-06                              | 0.5552      | 0.1198 | 1.74 |

399

400 **Table S9. Summary for AD susceptibility variants after adjusting for confounding**  
401 **factors.** Statistical metrics for fifty-nine variants passed the validation stage with a nominal  $p$ -  
402 value passing the genome-wide significance threshold ( $p < 5E-8$ ) in the combined dataset after  
403 adjusting for age, gender and phenotype-associated PCs. AD, Alzheimer’s disease; CHR,  
404 chromosome(s); BP, base positions in GRCh37 annotation; SNP, single nucleotide  
405 polymorphism; EA, effect allele; EAF, effect allele frequency; NC, normal controls; OR, odds  
406 ratio. CONVERGE, China, Oxford and Virginia Commonwealth University Experimental  
407 Research on Genetic Epidemiology; 1KG: 1000 Genomes Phase 3 cohort; gnomAD, Genome  
408 Aggregation Database; EAS, East Asian.  
409

| CHR | BP       | SNP        | Nearest Genes <sup>†</sup> | EA | EAF_AD | Stage-1<br>(AD: 477 NC: 442) |             |            | Combined dataset<br>(AD: 477 NC: 2187) |             |            | EAF<br>CONV<br>ERGE | EAF<br>1KG<br>EAS | EAF<br>gnomA<br>D<br>EAS |
|-----|----------|------------|----------------------------|----|--------|------------------------------|-------------|------------|----------------------------------------|-------------|------------|---------------------|-------------------|--------------------------|
|     |          |            |                            |    |        | EAF                          | Effect size | $p$ -value | EAF                                    | Effect size | $p$ -value |                     |                   |                          |
| 14  | 55297043 | rs72713460 | GCH1                       | T  | 0.160  | 0.097                        | 0.588       | 6.31E-05   | 0.099                                  | 0.595       | 4.36E-05   | 0.125               | 0.129             | 0.120                    |
| 15  | 57612410 | rs2591054  | LINC01413                  | C  | 0.683  | 0.773                        | 0.451       | 3.50E-05   | 0.779                                  | 0.447       | 3.65E-05   | 0.719               | 0.754             | 0.755                    |
| 19  | 45371168 | rs4803766  | PVRL2                      | A  | 0.468  | 0.360                        | 0.428       | 6.71E-06   | 0.332                                  | 0.424       | 7.96E-06   | 0.340               | 0.394             | 0.386                    |
| 19  | 45372794 | rs404935   | PVRL2                      | A  | 0.280  | 0.154                        | 0.722       | 7.11E-10   | 0.145                                  | 0.715       | 7.55E-10   | 0.144               | 0.147             | 0.150                    |
| 19  | 45373565 | rs395908   | PVRL2                      | A  | 0.273  | 0.149                        | 0.731       | 9.11E-10   | 0.143                                  | 0.728       | 7.66E-10   | 0.144               | 0.144             | 0.151                    |
| 19  | 45376284 | rs519113   | PVRL2                      | G  | 0.297  | 0.166                        | 0.745       | 1.87E-10   | 0.130                                  | 0.759       | 7.02E-11   | 0.152               | 0.163             | 0.168                    |
| 19  | 45378144 | rs34278513 | PVRL2                      | T  | 0.262  | 0.145                        | 0.720       | 2.88E-09   | 0.137                                  | 0.709       | 3.46E-09   | 0.126               | 0.132             | 0.147                    |
| 19  | 45379516 | rs412776   | PVRL2                      | A  | 0.277  | 0.146                        | 0.778       | 9.82E-11   | 0.136                                  | 0.766       | 1.29E-10   | 0.129               | 0.127             | 0.145                    |
| 19  | 45380961 | rs3865427  | PVRL2                      | A  | 0.256  | 0.137                        | 0.731       | 1.87E-09   | 0.128                                  | 0.724       | 1.90E-09   | 0.125               | 0.126             | 0.140                    |
| 19  | 45380970 | rs11668861 | PVRL2                      | T  | 0.672  | 0.775                        | 0.518       | 1.31E-06   | 0.794                                  | 0.500       | 2.61E-06   | 0.787               | 0.775             | 0.761                    |
| 19  | 45382034 | rs6859     | PVRL2                      | G  | 0.585  | 0.692                        | 0.515       | 6.72E-07   | 0.759                                  | 0.509       | 7.43E-07   | 0.696               | 0.692             | 0.688                    |
| 19  | 45382966 | rs3852860  | PVRL2                      | T  | 0.661  | 0.758                        | 0.481       | 6.13E-06   | 0.780                                  | 0.457       | 1.52E-05   | 0.778               | 0.765             | 0.761                    |
| 19  | 45383061 | rs3852861  | PVRL2                      | T  | 0.667  | 0.761                        | 0.470       | 9.26E-06   | 0.783                                  | 0.447       | 2.26E-05   | 0.778               | 0.765             | 0.763                    |
| 19  | 45383079 | rs71352237 | PVRL2                      | C  | 0.254  | 0.135                        | 0.746       | 1.49E-09   | 0.121                                  | 0.734       | 1.81E-09   | 0.119               | 0.124             | 0.128                    |
| 19  | 45383115 | rs34224078 | PVRL2                      | G  | 0.254  | 0.135                        | 0.746       | 1.49E-09   | 0.120                                  | 0.734       | 1.78E-09   | 0.119               | 0.124             | 0.129                    |
| 19  | 45383139 | rs35879138 | PVRL2                      | A  | 0.254  | 0.135                        | 0.746       | 1.49E-09   | 0.120                                  | 0.734       | 1.78E-09   | 0.119               | 0.124             | 0.128                    |
| 19  | 45387459 | rs12972156 | PVRL2                      | G  | 0.243  | 0.110                        | 0.913       | 4.96E-12   | 0.096                                  | 0.897       | 5.95E-12   | 0.092               | 0.095             | 0.098                    |
| 19  | 45387596 | rs12972970 | PVRL2                      | A  | 0.243  | 0.110                        | 0.913       | 4.96E-12   | 0.096                                  | 0.897       | 5.97E-12   | 0.093               | 0.095             | 0.098                    |
| 19  | 45388130 | rs34342646 | PVRL2                      | A  | 0.243  | 0.110                        | 0.913       | 4.96E-12   | 0.097                                  | 0.897       | 5.98E-12   | 0.093               | 0.095             | 0.100                    |
| 19  | 45388500 | rs283811   | PVRL2                      | G  | 0.312  | 0.196                        | 0.623       | 2.82E-08   | 0.184                                  | 0.590       | 1.22E-07   | 0.178               | 0.203             | 0.194                    |
| 19  | 45388568 | rs283812   | PVRL2                      | C  | 0.362  | 0.231                        | 0.532       | 4.82E-08   | 0.165                                  | 0.519       | 1.04E-07   | 0.156               | NA                | 0.006                    |
| 19  | 45390333 | rs283815   | PVRL2                      | G  | 0.319  | 0.203                        | 0.609       | 4.25E-08   | 0.188                                  | 0.576       | 1.96E-07   | 0.184               | 0.214             | 0.194                    |
| 19  | 45392254 | rs6857     | PVRL2                      | T  | 0.248  | 0.111                        | 0.919       | 2.21E-12   | 0.096                                  | 0.900       | 3.27E-12   | 0.094               | 0.100             | 0.097                    |
| 19  | 45394336 | rs71352238 | TOMM40                     | C  | 0.247  | 0.109                        | 0.934       | 1.25E-12   | 0.096                                  | 0.917       | 1.67E-12   | 0.094               | 0.097             | 0.098                    |
| 19  | 45394969 | rs184017   | TOMM40                     | G  | 0.318  | 0.203                        | 0.605       | 4.66E-08   | 0.185                                  | 0.572       | 2.07E-07   | 0.181               | 0.208             | 0.198                    |
| 19  | 45395266 | rs157580   | TOMM40                     | A  | 0.550  | 0.448                        | 0.404       | 1.99E-05   | 0.415                                  | 0.381       | 5.53E-05   | 0.430               | 0.459             | 0.443                    |
| 19  | 45395619 | rs2075650  | TOMM40                     | G  | 0.245  | 0.109                        | 0.933       | 1.84E-12   | 0.096                                  | 0.918       | 2.06E-12   | 0.094               | 0.097             | 0.087                    |
| 19  | 45395714 | rs157581   | TOMM40                     | C  | 0.361  | 0.236                        | 0.587       | 2.19E-08   | 0.208                                  | 0.564       | 7.06E-08   | 0.220               | 0.246             | 0.228                    |
| 19  | 45395909 | rs34404554 | TOMM40                     | G  | 0.246  | 0.109                        | 0.934       | 1.53E-12   | 0.096                                  | 0.920       | 1.65E-12   | 0.094               | 0.097             | 0.099                    |
| 19  | 45396144 | rs11556505 | TOMM40                     | T  | 0.245  | 0.108                        | 0.939       | 1.36E-12   | 0.096                                  | 0.926       | 1.36E-12   | 0.094               | 0.096             | 0.087                    |
| 19  | 45396219 | rs157582   | TOMM40                     | T  | 0.322  | 0.204                        | 0.607       | 2.86E-08   | 0.188                                  | 0.578       | 1.13E-07   | 0.182               | 0.209             | 0.186                    |
| 19  | 45396665 | rs59007384 | TOMM40                     | T  | 0.321  | 0.215                        | 0.538       | 7.00E-07   | 0.184                                  | 0.503       | 3.21E-06   | 0.189               | 0.227             | 0.208                    |
| 19  | 45404691 | rs405697   | TOMM40                     | G  | 0.512  | 0.411                        | 0.406       | 2.14E-05   | 0.387                                  | 0.392       | 4.20E-05   | 0.392               | 0.436             | 0.418                    |
| 19  | 45406673 | rs10119    | TOMM40                     | A  | 0.280  | 0.119                        | 0.999       | 3.73E-15   | 0.098                                  | 0.980       | 5.10E-15   | 0.097               | 0.096             | 0.102                    |
| 19  | 45409167 | rs440446   | APOE                       | G  | 0.508  | 0.407                        | 0.401       | 2.58E-05   | 0.381                                  | 0.378       | 7.20E-05   | 0.383               | 0.428             | 0.396                    |
| 19  | 45410002 | rs769449   | APOE                       | A  | 0.252  | 0.104                        | 0.984       | 1.09E-13   | 0.089                                  | 0.950       | 2.75E-13   | 0.086               | 0.077             | 0.090                    |
| 19  | 45411941 | rs429358   | APOE                       | C  | 0.278  | 0.113                        | 1.013       | 2.23E-15   | 0.083                                  | 0.991       | 3.77E-15   | 0.093               | 0.086             | 0.089                    |
| 19  | 45413576 | rs75627662 | APOE                       | T  | 0.306  | 0.200                        | 0.526       | 1.00E-06   | 0.191                                  | 0.506       | 2.34E-06   | 0.185               | 0.191             | 0.189                    |
| 19  | 45414451 | rs439401   | APOE                       | C  | 0.535  | 0.427                        | 0.429       | 7.32E-06   | 0.407                                  | 0.406       | 2.13E-05   | 0.407               | 0.444             | 0.414                    |
| 19  | 45415713 | rs10414043 | Intergenic                 | A  | 0.269  | 0.114                        | 0.974       | 3.13E-14   | 0.108                                  | 0.940       | 8.48E-14   | 0.104               | 0.088             | 0.100                    |
| 19  | 45415935 | rs7256200  | APOC1                      | T  | 0.266  | 0.114                        | 0.961       | 7.38E-14   | 0.107                                  | 0.926       | 1.96E-13   | 0.104               | 0.085             | 0.097                    |
| 19  | 45416178 | rs483082   | APOC1                      | T  | 0.332  | 0.207                        | 0.602       | 1.52E-08   | 0.195                                  | 0.583       | 4.06E-08   | 0.191               | 0.202             | 0.193                    |
| 19  | 45416478 | rs584007   | APOC1                      | G  | 0.531  | 0.429                        | 0.406       | 2.08E-05   | 0.402                                  | 0.382       | 6.09E-05   | 0.407               | 0.447             | 0.416                    |
| 19  | 45416741 | rs438811   | APOC1                      | T  | 0.332  | 0.207                        | 0.602       | 1.52E-08   | 0.195                                  | 0.583       | 4.07E-08   | 0.192               | 0.202             | 0.194                    |
| 19  | 45418790 | rs5117     | APOC1                      | C  | 0.308  | 0.201                        | 0.522       | 1.03E-06   | 0.185                                  | 0.500       | 2.73E-06   | 0.181               | 0.205             | 0.189                    |



|    |          |             |            |   |       |       |       |          |       |       |          |       |       |       |
|----|----------|-------------|------------|---|-------|-------|-------|----------|-------|-------|----------|-------|-------|-------|
| 19 | 45418961 | rs3826688   | APOC1      | C | 0.531 | 0.430 | 0.403 | 2.52E-05 | 0.402 | 0.380 | 6.97E-05 | 0.397 | 0.454 | 0.422 |
| 19 | 45420082 | rs73052335  | APOC1      | C | 0.325 | 0.153 | 0.877 | 1.30E-14 | 0.101 | 0.870 | 1.44E-14 | 0.112 | NA    | 0.094 |
| 19 | 45421254 | rs12721046  | APOC1      | A | 0.296 | 0.126 | 0.986 | 1.26E-15 | 0.105 | 0.964 | 2.10E-15 | 0.116 | 0.097 | 0.111 |
| 19 | 45421877 | rs484195    | APOC1      | G | 0.533 | 0.424 | 0.437 | 6.11E-06 | 0.396 | 0.410 | 2.07E-05 | 0.404 | 0.460 | 0.416 |
| 19 | 45422160 | rs12721051  | APOC1      | G | 0.296 | 0.127 | 0.976 | 1.96E-15 | 0.118 | 0.949 | 4.46E-15 | 0.116 | 0.099 | 0.098 |
| 19 | 45422846 | rs56131196  | APOC1      | A | 0.297 | 0.127 | 0.982 | 1.37E-15 | 0.117 | 0.957 | 2.77E-15 | 0.116 | 0.099 | 0.113 |
| 19 | 45422946 | rs4420638   | APOC1      | G | 0.293 | 0.127 | 0.968 | 4.05E-15 | 0.118 | 0.940 | 9.07E-15 | 0.116 | 0.099 | 0.114 |
| 19 | 45425175 | rs157594    | Intergenic | G | 0.533 | 0.427 | 0.432 | 8.38E-06 | 0.393 | 0.405 | 2.78E-05 | 0.336 | 0.454 | 0.415 |
| 19 | 45425460 | rs157595    | Intergenic | G | 0.535 | 0.428 | 0.434 | 7.14E-06 | 0.396 | 0.406 | 2.54E-05 | 0.399 | 0.463 | 0.414 |
| 19 | 45427125 | rs111789331 | Intergenic | A | 0.269 | 0.121 | 0.920 | 3.14E-13 | 0.113 | 0.892 | 6.74E-13 | 0.112 | 0.092 | 0.104 |
| 19 | 45428234 | rs66626994  | APOC1P1    | A | 0.270 | 0.122 | 0.919 | 3.08E-13 | 0.112 | 0.894 | 5.86E-13 | 0.108 | 0.091 | 0.105 |
| 19 | 45429708 | rs60049679  | APOC1P1    | C | 0.245 | 0.154 | 0.559 | 3.39E-06 | 0.109 | 0.528 | 1.16E-05 | 0.115 | 0.129 | 0.151 |
| 21 | 39663760 | rs928771    | KCNJ15     | G | 0.238 | 0.154 | 0.537 | 9.81E-06 | 0.161 | 0.555 | 3.60E-06 | 0.172 | 0.125 | 0.172 |
| 21 | 39664976 | rs2836293   | KCNJ15     | A | 0.235 | 0.154 | 0.537 | 9.81E-06 | 0.161 | 0.555 | 3.60E-06 | 0.172 | 0.125 | 0.172 |

410 \* For the *APOE* region, the nearest genes located within  $\pm 2$  kb of the listed SNPs

411

412 **Table S10. Transethnic meta-analysis of identified AD risk loci.** Three previously published  
413 GWAS AD cohorts with cases diagnoses of AD and healthy normal controls together with the  
414 Chinese dataset were included in the meta-analysis: ADNI (AD: 515, NC: 339), ADC (AD:  
415 3,946, NC: 1,746), LOAD (AD: 464, NC: 2,231), and the combined dataset for the Chinese  
416 population (AD: 477, NC: 2,187). Meta  $p$ -values were obtained from the METASOFT program  
417 on the basis of the estimation of the Han and Eskin's Random Effects model (RE-HE, or RE2).  
418 AD, Alzheimer's disease; CHR, chromosome(s); BP, base positions in GRCh37 annotation;  
419 SNP, single nucleotide polymorphism; EA, effect alleles; EAF, effect allele frequency; OR,  
420 odds ratio; SD, standard deviations; NC, normal control; WGS, whole-genome sequencing;  
421 ADNI, Alzheimer's Disease Neuroimaging Initiative; ADC, Alzheimer's Disease Centers  
422 Cohort; LOAD, Late-onset Alzheimer's disease Family Study;  $I^2$ ,  $I$ -square heterogeneity  
423 statistic;  $Q$ , Cochran's  $Q$  statistic;  $\tau^2$ ,  $Tau$ -square heterogeneity estimator of DerSimonian–  
424 Laird.  
425

| Variants    | Genes  | Cohorts | $p$ -value | Effect size | SE     | $p$ -value | $I^2$ | $Q$   | $p$ -value ( $Q$ ) | $\tau^2$ |
|-------------|--------|---------|------------|-------------|--------|------------|-------|-------|--------------------|----------|
| rs72713460* | GCH1   | Chinese | 4.36E-05   | 0.5944      | 0.1454 | 2.53E-04   | 73.81 | 11.46 | 9.50E-03           | 0.024    |
|             |        | ADNI    | 9.60E-02   | 0.2154      | 0.1294 |            |       |       |                    |          |
|             |        | ADC     | 1.44E-01   | 0.0788      | 0.0539 |            |       |       |                    |          |
|             |        | LOAD    | 1.64E-01   | 0.1181      | 0.0849 |            |       |       |                    |          |
| rs928771*   | KCNJ15 | Chinese | 3.60E-06   | 0.5552      | 0.1198 | 6.41E-04   | 81.31 | 16.05 | 1.11E-03           | 0.026    |
|             |        | ADNI    | 7.44E-01   | 0.0338      | 0.1035 |            |       |       |                    |          |
|             |        | ADC     | 1.93E-01   | 0.0574      | 0.0441 |            |       |       |                    |          |
|             |        | LOAD    | 4.11E-01   | 0.0607      | 0.0738 |            |       |       |                    |          |

426 \* Statistical metrics with  $p < 5E-2$  in the corresponding cohort(s).  
427

428 **Table S11. Plasma biomarkers associated with AD risk genotypes.** A total of 146 plasma  
429 biomarkers obtained from the ADNI dataset were included in the analysis of possible  
430 modulation effects due to the identified AD risk variants, rs72713460 and rs928771. Ten  
431 biomarkers exhibiting low variance in their expression levels were removed prior to the  
432 analysis. The table shows the plasma biomarkers significantly associated with the genotypes  
433 in the AD subjects (sample  $n = 69$ ) with a  $p < 0.05$  after adjusting for age, gender, and the top  
434 five PCs. Biomarkers with an average detection signal lower than the limit of detection (LOD)  
435 were also excluded from the table. SE, standard error; FDR, false discovery rate.  
436

| Gene          | SNP               | Biomarker                                                           | Effect size | SE      | <i>p</i> -value | FDR   |
|---------------|-------------------|---------------------------------------------------------------------|-------------|---------|-----------------|-------|
| <b>GCHI</b>   | <b>rs72713460</b> | Matrix metalloproteinase-2 (MMP-2) (ng/mL)                          | 0.0534      | 0.0176  | 3.07E-03        | 0.276 |
|               |                   | Pancreatic polypeptide (PPP) (pg/mL)                                | -0.1454     | 0.0541  | 8.50E-03        | 0.459 |
|               |                   | Eotaxin-3 (pg/mL)                                                   | -0.0476     | 0.0200  | 1.93E-02        | 0.579 |
|               |                   | Matrix metalloproteinase-7 (MMP-7) (ng/mL)                          | 0.0566      | 0.0248  | 2.48E-02        | 0.604 |
|               |                   | Resistin (ng/mL)                                                    | 0.0360      | 0.0160  | 2.69E-02        | 0.604 |
|               |                   | Glutathione S-transferase alpha (GST-alpha) (ng/mL)                 | -0.1305     | 0.0637  | 4.32E-02        | 0.729 |
| <b>KCNJ15</b> | <b>rs928771</b>   | TNF-related apoptosis-inducing ligand receptor 3 (TRAIL-R3) (ng/mL) | -0.0553     | 0.0174  | 2.00E-03        | 0.276 |
|               |                   | Alpha-1-microglobulin (A1Micro) (µg/mL)                             | -0.0451     | 0.0144  | 2.30E-03        | 0.276 |
|               |                   | Tissue inhibitor of metalloproteinases-1 (TIMP-1) (ng/mL)           | -0.0364     | 0.0149  | 1.65E-02        | 0.556 |
|               |                   | Myeloid progenitor inhibitory factor-1 (CCL23) (ng/mL)              | -0.0298     | 0.0131  | 2.59E-02        | 0.604 |
|               |                   | Thrombomodulin (TM) (ng/mL)                                         | -0.0319     | 0.0145  | 2.99E-02        | 0.605 |
|               |                   | Apolipoprotein H (Apo H) (µg/mL)                                    | -32.2527    | 14.7603 | 3.14E-02        | 0.605 |
|               |                   | Thymus-expressed chemokine (TECK) (ng/mL)                           | -0.0420     | 0.0207  | 4.50E-02        | 0.729 |
|               |                   | Macrophage-derived chemokine (MDC) (pg/mL)                          | -0.0323     | 0.0160  | 4.59E-02        | 0.729 |
|               |                   | Brain-derived neurotrophic factor (BDNF) (ng/mL)                    | 0.0959      | 0.0480  | 4.86E-02        | 0.729 |

437

438

439 **Table S12. CSF biomarkers associated with AD risk genotypes.** A total of 83 plasma  
 440 biomarkers obtained from the ADNI dataset were included in the analysis of possible  
 441 modulation effects due to the identified AD risk variants, rs72713460 and rs928771. One  
 442 biomarker exhibiting low variance in its expression level was removed prior to the analysis.  
 443 The table shows the plasma biomarkers significantly associated with the genotypes in the AD  
 444 subjects (sample  $n = 103$ ) with a  $p < 0.05$  after adjusting for age, gender, and the top five PCs.  
 445 Biomarkers with an average detection signal lower than the limit of detection (LOD) were also  
 446 excluded from the table. SE, standard error; FDR, false discovery rate.  
 447

| Gene   | SNP        | Biomarker                                              | Effect size | SE     | <i>p</i> -value | FDR   |
|--------|------------|--------------------------------------------------------|-------------|--------|-----------------|-------|
| GCH1   | rs72713460 | Interleukin-25 (IL-25) (pg/mL)                         | -0.9062     | 0.4089 | 3.05E-02        | 0.973 |
|        |            | Angiotensin-converting enzyme (ACE) (ng/mL)            | -0.0648     | 0.0299 | 3.43E-02        | 0.973 |
|        |            | Immunoglobulin A (IgA) (mg/mL)                         | 0.0920      | 0.0426 | 3.48E-02        | 0.973 |
|        |            | C-reactive protein (CRP) ( $\mu$ g/mL)                 | 0.2424      | 0.1165 | 4.18E-02        | 0.973 |
| KCNJ15 | rs928771   | Cancer antigen 19-9 (U/mL)                             | 0.1511      | 0.0592 | 1.33E-02        | 0.973 |
|        |            | Interleukin-25 (IL-25) (pg/mL)                         | 1.0349      | 0.4843 | 3.67E-02        | 0.973 |
|        |            | Macrophage colony-stimulating factor-1 (M-CSF) (ng/mL) | 0.0569      | 0.0282 | 4.84E-02        | 0.986 |

448

449 **Table S13. GO analysis of the genes regulated by AD susceptibility loci.** A total of 52  
450 candidate variants from 3 AD susceptibility loci (*APOE-APOC1*, 49 SNPs; *KCNJ15*, 2 SNPs;  
451 and *GCHI* 1 SNP) passing the genome-wide significance threshold in the combined dataset  
452 were subjected to genotype-expression analysis for possible regulatory effects in the  
453 hippocampal and blood transcriptome datasets (GTEx dataset). The table shows the  
454 representative ontologies for identified genes regulated by AD risk loci obtained from blood  
455 (sample  $n = 365$ ) and hippocampus (sample  $n = 87$ ) transcriptome datasets with an FDR <  
456  $1E-3$ . GO, gene ontology; FDR, false discovery rate.  
457

| Blood eGene network       |                                                                                                                           |        |          |
|---------------------------|---------------------------------------------------------------------------------------------------------------------------|--------|----------|
| Pathway ID                | Description                                                                                                               | Counts | FDR      |
| GO.0006952                | Defense response                                                                                                          | 27     | 3.61E-06 |
| GO.0006955                | Immune response                                                                                                           | 25     | 1.19E-05 |
| GO.0045087                | Innate immune response                                                                                                    | 21     | 1.32E-05 |
| GO.0006950                | Response to stress                                                                                                        | 39     | 1.07E-04 |
| GO.0002376                | Immune system process                                                                                                     | 28     | 2.04E-04 |
| GO.0006956                | Complement activation                                                                                                     | 6      | 2.04E-04 |
| GO.0002460                | Adaptive immune response based on somatic recombination of immune receptors built from immunoglobulin superfamily domains | 8      | 2.23E-04 |
| GO.0050776                | Regulation of immune response                                                                                             | 17     | 4.72E-04 |
| GO.0006958                | Complement activation, classical pathway                                                                                  | 5      | 6.46E-04 |
| GO.0050778                | Positive regulation of immune response                                                                                    | 14     | 6.46E-04 |
| Hippocampus eGene network |                                                                                                                           |        |          |
| Pathway ID                | Description                                                                                                               | Counts | FDR      |
| GO.0071310                | Cellular response to organic substance                                                                                    | 44     | 6.69E-10 |
| GO.0010033                | Response to organic substance                                                                                             | 48     | 1.05E-08 |
| GO.0016032                | Viral process                                                                                                             | 26     | 1.05E-08 |
| GO.0044403                | Symbiosis, encompassing mutualism through parasitism                                                                      | 27     | 1.05E-08 |
| GO.0070887                | Cellular response to chemical stimulus                                                                                    | 46     | 1.05E-08 |
| GO.0007166                | Cell surface receptor signalling pathway                                                                                  | 41     | 2.02E-07 |
| GO.0007165                | Signal transduction                                                                                                       | 65     | 2.39E-07 |
| GO.0071363                | Cellular response to growth factor stimulus                                                                               | 22     | 6.93E-07 |
| GO.0044700                | Single organism signalling                                                                                                | 65     | 2.63E-06 |
| GO.0009719                | Response to endogenous stimulus                                                                                           | 31     | 3.89E-06 |
| GO.0051128                | Regulation of cellular component organization                                                                             | 39     | 4.92E-06 |
| GO.0007154                | Cell communication                                                                                                        | 64     | 1.44E-05 |
| GO.0006950                | Response to stress                                                                                                        | 50     | 1.81E-05 |
| GO.0071345                | Cellular response to cytokine stimulus                                                                                    | 18     | 2.00E-05 |
| GO.0051704                | Multi-organism process                                                                                                    | 38     | 2.86E-05 |
| GO.0009611                | Response to wounding                                                                                                      | 21     | 3.84E-05 |
| GO.0051130                | Positive regulation of cellular component organization                                                                    | 26     | 3.90E-05 |
| GO.0034097                | Response to cytokine                                                                                                      | 19     | 4.51E-05 |
| GO.0051716                | Cellular response to stimulus                                                                                             | 69     | 5.12E-05 |
| GO.0071495                | Cellular response to endogenous stimulus                                                                                  | 24     | 5.73E-05 |
| GO.0051641                | Cellular localization                                                                                                     | 36     | 5.99E-05 |
| GO.0042221                | Response to chemical                                                                                                      | 51     | 6.63E-05 |
| GO.0048522                | Positive regulation of cellular process                                                                                   | 56     | 7.54E-05 |
| GO.0010941                | Regulation of cell death                                                                                                  | 29     | 7.91E-05 |
| GO.0006952                | Defence response                                                                                                          | 28     | 9.98E-05 |
| GO.0019058                | Viral life cycle                                                                                                          | 12     | 9.98E-05 |
| GO.0007167                | Enzyme linked receptor protein signalling pathway                                                                         | 22     | 1.47E-04 |
| GO.0019222                | Regulation of metabolic process                                                                                           | 70     | 2.00E-04 |
| GO.0042981                | Regulation of apoptotic process                                                                                           | 27     | 2.13E-04 |
| GO.0048583                | Regulation of response to stimulus                                                                                        | 46     | 2.13E-04 |
| GO.1902531                | Regulation of intracellular signal transduction                                                                           | 27     | 2.22E-04 |
| GO.0045667                | Regulation of osteoblast differentiation                                                                                  | 8      | 3.86E-04 |

|            |                                            |    |          |
|------------|--------------------------------------------|----|----------|
| GO.0045087 | Innate immune response                     | 21 | 5.55E-04 |
| GO.2001137 | Positive regulation of endocytic recycling | 3  | 5.55E-04 |
| GO.0051649 | Establishment of localization in cell      | 30 | 5.84E-04 |
| GO.0014070 | Response to organic cyclic compound        | 19 | 7.73E-04 |
| GO.0034613 | Cellular protein localization              | 23 | 7.73E-04 |
| GO.0008104 | Protein localization                       | 29 | 7.80E-04 |
| GO.0050793 | Regulation of developmental process        | 33 | 7.80E-04 |
| GO.0009653 | Anatomical structure morphogenesis         | 33 | 7.85E-04 |
| GO.0007507 | Heart development                          | 14 | 8.99E-04 |
| GO.0060429 | Epithelium development                     | 21 | 8.99E-04 |
| GO.0051246 | Regulation of protein metabolic process    | 36 | 9.01E-04 |
|            |                                            |    |          |
| GO.0005829 | Cytosol                                    | 56 | 1.21E-08 |
| GO.0005925 | Focal adhesion                             | 13 | 7.21E-04 |
| GO.0043233 | Organelle lumen                            | 53 | 7.21E-04 |
| GO.0070013 | Intracellular organelle lumen              | 52 | 7.21E-04 |
|            |                                            |    |          |
| 4510       | Focal adhesion                             | 11 | 9.16E-05 |

458

459 **Table S14. Summary statistics for the Caucasian AD risk loci in the Chinese population.**  
460 Detailed summary statistics for the 16 AD Caucasian risk loci (23) in Chinese subjects (AD:  
461 477; NC: 2187 [442 from the in-house WGS dataset and 1,745 from CONVERGE dataset])  
462 derived from the association analysis results based on the Chinese WGS dataset. EA, effect  
463 allele; EAF, effect allele frequency in the combined control samples; OR, odds ratio; CI,  
464 confidence intervals; WGS, whole-genome sequencing. CONVERGE, China, Oxford and  
465 Virginia Commonwealth University Experimental Research on Genetic Epidemiology; 1KG:  
466 1000 Genomes Phase 3 cohort; gnomAD, Genome Aggregation Database; EAS, East Asian.  
467  $\beta$ , beta (effect size); SE, standard error; OR, odds ratio.  
468  
469

| SNPs        | Location     | Genes                | EA | Caucasian GWAS |                 |      | Chinese WGS data<br>(Adjusted for age, gender, and phenotype-associated PCs) |                 |         |       |      | EAF in CONVERGE | EAF in 1KG (EAS) | EAF in gnomAD (EAS) |
|-------------|--------------|----------------------|----|----------------|-----------------|------|------------------------------------------------------------------------------|-----------------|---------|-------|------|-----------------|------------------|---------------------|
|             |              |                      |    | EAF            | <i>p</i> -value | OR   | EAF                                                                          | <i>p</i> -value | $\beta$ | SE    | OR   |                 |                  |                     |
| rs6733839*  | 2:127892810  | BIN1                 | T  | 0.409          | 6.9E-44         | 1.21 | 0.453                                                                        | 4.7E-02         | 0.188   | 0.094 | 1.21 | 0.444           | 0.372            | 0.437               |
| rs190982    | 5:88223420   | MEF2C                | G  | 0.408          | 3.2E-08         | 0.92 | 0.128                                                                        | 3.8E-01         | 0.118   | 0.136 | 1.13 | 0.157           | 0.133            | 0.149               |
| rs9271192   | 6:32578530   | HLA-DRB5<br>HLA-DRB1 | C  | 0.276          | 5.2E-11         | 1.11 | 0.182                                                                        | 8.6E-01         | 0.022   | 0.128 | 1.02 | 0.197           | 0.231            | 0.188               |
| rs10948363* | 6:47487762   | CD2AP                | G  | 0.266          | 2.9E-12         | 1.10 | 0.123                                                                        | 4.5E-02         | 0.286   | 0.143 | 1.33 | 0.122           | 0.123            | 0.148               |
| rs2718058   | 7:37841534   | NME8                 | G  | 0.373          | 1.1E-13         | 1.10 | 0.218                                                                        | 8.3E-01         | 0.024   | 0.113 | 1.02 | 0.216           | 0.191            | 0.201               |
| rs1476679   | 7:100004446  | ZCWPW1               | C  | 0.287          | 4.8E-09         | 0.93 | 0.371                                                                        | 9.7E-01         | 0.019   | 0.101 | 1.02 | 0.329           | 0.349            | 0.333               |
| rs11771145† | 7:143110762  | EPHA1                | A  | 0.338          | 5.6E-10         | 0.92 | 0.546                                                                        | 1.4E-01         | -0.135  | 0.092 | 0.87 | 0.522           | 0.522            | 0.496               |
| rs28834970  | 8:27195121   | PTK2B                | C  | 0.366          | 2.8E-25         | 0.90 | 0.273                                                                        | 7.0E-01         | 0.039   | 0.101 | 1.04 | 0.265           | 0.257            | 0.305               |
| rs9331896   | 8:27467686   | CLU                  | C  | 0.379          | 7.4E-14         | 1.10 | 0.186                                                                        | 8.4E-01         | 0.024   | 0.120 | 1.02 | 0.195           | 0.219            | 0.205               |
| rs10838725  | 11:47557871  | CELF1                | C  | 0.316          | 6.1E-16         | 0.86 | 0.313                                                                        | 5.1E-01         | 0.068   | 0.102 | 1.07 | 0.303           | 0.386            | 0.374               |
| rs10792832  | 11:85867875  | PICALM               | A  | 0.358          | 9.7E-15         | 1.08 | 0.381                                                                        | 7.4E-02         | -0.174  | 0.098 | 0.84 | 0.382           | 0.409            | 0.408               |
| rs11218343  | 11:121435587 | SORL1                | C  | 0.039          | 1.1E-08         | 0.88 | 0.311                                                                        | 1.1E-01         | -0.169  | 0.107 | 0.84 | 0.282           | 0.288            | 0.294               |
| rs17125944* | 14:53400629  | FERMT2               | C  | 0.092          | 5.5E-09         | 0.76 | 0.229                                                                        | 3.6E-02         | -0.240  | 0.114 | 0.79 | 0.224           | 0.227            | 0.211               |
| rs10498633  | 14:92926952  | SLC24A4-<br>RIN3     | T  | 0.217          | 7.9E-09         | 1.13 | 0.111                                                                        | 9.1E-01         | -0.018  | 0.157 | 0.98 | 0.113           | 0.085            | 0.100               |
| rs4147929   | 19:1063443   | ABCA7                | A  | 0.190          | 1.1E-15         | 0.90 | 0.329                                                                        | 1.5E-01         | 0.140   | 0.098 | 1.15 | 0.326           | 0.354            | 0.334               |
| rs3865444   | 19:51727962  | CD33                 | A  | 0.307          | 3.0E-06         | 1.14 | 0.191                                                                        | 8.1E-01         | 0.030   | 0.126 | 1.03 | 0.191           | 0.186            | 0.175               |

470 \* Statistical metrics with  $p < 5E-2$  in the Chinese dataset.

471 † Minor allele switched in Chinese cohort (EPHA1, rs11771145).

472 Caucasian GWAS data were obtained from ref. 23.

473 **Supplemental References**

474

475 1. Saykin AJ, *et al.* (2015) Genetic studies of quantitative MCI and AD phenotypes in ADNI:  
476 Progress, opportunities, and plans. *Alzheimers Dement* 11(7):792-814.

477 2. Naj AC, *et al.* (2011) Common variants at MS4A4/MS4A6E, CD2AP, CD33 and EPHA1  
478 are associated with late-onset Alzheimer's disease. *Nat Genet* 43(5):436-+.

479 3. Jun G (2011) Meta-analysis Confirms CR1, CLU, and PICALM as Alzheimer Disease  
480 Risk Loci and Reveals Interactions With APOE Genotypes (vol 67, pg 1473, 2010). *Arch*  
481 *Neurol-Chicago* 68(2):159-159.

482 4. Lee JH, Cheng R, Graff-Radford N, Foroud T, & Mayeux R (2008) Analyses of the  
483 national institute on aging late-onset alzheimer's disease family study: implication of  
484 additional loci. *Arch Neurol-Chicago* 65(11):1518-1526.

485 5. Purcell S, *et al.* (2007) PLINK: A tool set for whole-genome association and population-  
486 based linkage analyses. *Am J Hum Genet* 81(3):559-575.

487 6. Das S, *et al.* (2016) Next-generation genotype imputation service and methods. *Nat Genet*  
488 48(10):1284-1287.

489 7. McCarthy S, *et al.* (2016) A reference panel of 64,976 haplotypes for genotype  
490 imputation. *Nat Genet* 48(10):1279-1283.

491 8. Loh PR, *et al.* (2016) Reference-based phasing using the Haplotype Reference Consortium  
492 panel. *Nat Genet* 48(11):1443-1448.

493 9. Jun G, Wing MK, Abecasis GR, & Kang HM (2015) An efficient and scalable analysis  
494 framework for variant extraction and refinement from population-scale DNA sequence  
495 data. *Genome Res* 25(6):918-925.

496 10. Andrews S (FastQC A Quality Control tool for High Throughput Sequence Data.  
497 <http://www.bioinformatics.babraham.ac.uk/projects/fastqc/>.

498 11. Bolger AM, Lohse M, & Usadel B (2014) Trimmomatic: a flexible trimmer for Illumina  
499 sequence data. *Bioinformatics* 30(15):2114-2120.

500 12. Browning SR & Browning BL (2007) Rapid and accurate haplotype phasing and missing-  
501 data inference for whole-genome association studies by use of localized haplotype  
502 clustering. *Am J Hum Genet* 81(5):1084-1097.

503 13. Browning BL & Browning SR (2009) A Unified Approach to Genotype Imputation and  
504 Haplotype-Phase Inference for Large Data Sets of Trios and Unrelated Individuals. *Am J*  
505 *Hum Genet* 84(2):210-223.

506 14. Danecek P, *et al.* (2011) The variant call format and VCFtools. *Bioinformatics*  
507 27(15):2156-2158.

508 15. Abraham G & Inouye M (2014) Fast Principal Component Analysis of Large-Scale  
509 Genome-Wide Data. *PLoS One* 9(4).



- 510 16. Price AL, *et al.* (2006) Principal components analysis corrects for stratification in  
511 genome-wide association studies. *Nat Genet* 38(8):904-909.
- 512 17. Raj A, Stephens M, & Pritchard JK (2014) fastSTRUCTURE: Variational Inference of  
513 Population Structure in Large SNP Data Sets. *Genetics* 197(2):573-U207.
- 514 18. Consortium GT (2015) Human genomics. The Genotype-Tissue Expression (GTEx) pilot  
515 analysis: multitissue gene regulation in humans. *Science* 348(6235):648-660.
- 516 19. Consortium GT (2013) The Genotype-Tissue Expression (GTEx) project. *Nature genetics*  
517 45(6):580-585.
- 518 20. Karssen L & Team G (2013) New Software and Developments in the GenABEL Project.  
519 *Hum Hered* 76(2):111-111.
- 520 21. Cai N, *et al.* (2017) 11,670 whole-genome sequences representative of the Han Chinese  
521 population from the CONVERGE project. *Sci Data* 4:170011.
- 522 22. Mueller SG, *et al.* (2005) Ways toward an early diagnosis in Alzheimer's disease: the  
523 Alzheimer's Disease Neuroimaging Initiative (ADNI). *Alzheimers Dement* 1(1):55-66.
- 524 23. Lambert JC, *et al.* (2013) Meta-analysis of 74,046 individuals identifies 11 new  
525 susceptibility loci for Alzheimer's disease. *Nat Genet* 45(12):1452-1458.  
526  
527

528 **ADNI I, GO, II and III studies**

529 Andrew J. Saykin, Arthur W. Toga, Bret Borowski, Chad Ward, Charles DeCarli, Chet  
530 Mathis, Clifford R. Jack, Jr., Danielle Harvey, David Holtzman, David Jones, Devon Gessert,  
531 Eli Lilly, Eric M. Reiman, Erin Franklin, Franz Hefti, Greg Sorensen, Gustavo Jimenez,  
532 Howard Fillit, Jeff Gunter, Jennifer Salazar, John Hsiao, John Morris, John Q. Trojanowki,  
533 Karen Crawford, Scott Neu, Kejal Kantarci, Kelley Faber, Kelly Harless, Kewei Chen,  
534 Kwangsik Nho, Laurel Beckett, Lean Thal, Leon Thal, Leslie M. Shaw, Lew Kuller, Li Shen,  
535 Lindsey Hergesheimer, Lisa Taylor-Reinwald, M. Marcel Mesulam, Magdalena Korecka,  
536 Marc Raichle, Maria Carrillo, Marilyn Albert, Matt Senjem, Matthew Bernstein, Michael  
537 Donohue, Michael Weiner, Michal Figurski, Neil Buckholtz, Nick Fox, Nigel J. Cairns,  
538 Norbert Schuff, Norm Foster, Paul Aisen, Paul Thompson, Peter Davies, Peter J. Snyder, Peter  
539 Snyder, Prashanthi Vemuri, Richard Frank, Robert A. Koeppe, Robert C. Green, Ronald  
540 Petersen, Sarah Walter, Steven Paul, Steven Potkin, Sungeun Kim, Tatiana M. Foroud, Tom  
541 Montine, Virginia Lee, William Jagust, William Potter, Yuliana Cabrera, Zaven Khachaturian  
542

543 **Investigators of ADNI from university and institutes**

544

545 Adam Fleisher, Aimee Pierce, Akiva Mintz, Alan Lerner, Alexander Norbash, Allan I. Levey,  
546 Allyson Rosen, Amanda Smith, Anasztasia Ulysse, Andrew E. Budson, Andrew Kertesz,  
547 Angela Oliver, Ann Marie Hake, Anna Burke, Antero Sarrael, Anton P. Porsteinsson, Ashley  
548 Lamb, Athena Lee, Balebail Ashok Raj, Barton Lane, Beatriz Yanez, Beau Ances, Benita  
549 Mudge, Betty Lind, Bojana Stefanovic, Bonnie S. Goldstein, Borna Bonakdarpour, Brandy R.  
550 Matthews, Brian R. Ott, Brigid Reynolds, Bruce L. Miller, Bryan M. Spann, Carl Sadowsky,  
551 Charles Bernick, Charles D. Smith, Chiadi Onyike, Chris (Chinthaka) Heyn, Chris Hosein,  
552 Christi Leach, Christine M. Belden, Christopher H. van Dyck, Christopher M. Clark, Chuang-  
553 Kuo Wu, Colleen S. Albers, Connie Brand, Courtney Bodge, Curtis Tatsuoka, Cynthia M.  
554 Carlsson, Dana Mathews, Daniel D'Agostino II, Daniel H.S. Silverman, Daniel Marson, David  
555 A. Wolk, David Bachman, David Clark, David Geldmacher, David Hart, David Knopman,  
556 David Perry, David Winkfield, Delwyn D. Miller, Diana Kerwin, Dick Drost, Donna M.  
557 Simpson, Donna Munic, Douglas W. Scharre, Dr Rob Bartha, Dzintra Celmins, Earl A.  
558 Zimmerman, Edmond Teng, Edward Coleman, Edward Zamrini, Effie Mitsis, Elizabeth  
559 Finger, Elizabeth Oates, Elizabeth Sosa, Ellen Woo, Emily Rogalski, Evan Fletcher, Francine  
560 Parfitt, Gaby Thai, Gad A. Marshall, Gary Conrad, Geoffrey Tremont, George Bartzokis, Ging-  
561 Yuek Robin Hsiung, Gloria Chiang, Godfrey D. Pearlson, Greg Jicha, Helen Vanderswag,  
562 Hillel Grossman, Horacio Capote, Howard Bergman, Howard Chertkow, Howard Feldman,  
563 Howard J. Rosen, Hristina Koleva, Hyungsub Shim, Irina Rachinsky, Jacobo Mintzer, Jaimie  
564 Ziolkowski, James Brewer, James J. Lah, Jamika Singleton-Garvin, Janet S. Cellar, Jared R.  
565 Brosch, Jared Tinklenberg, Jason H. Karlawish, Javier Villanueva-Meyer, Jeffrey A. Kaye,  
566 Jeffrey M. Burns, Jeffrey R. Petrella, Jerome Yesavage, Joanne Allard, Joanne L. Lord, Joel  
567 Hetelle, John Brockington, John C. Morris, John Olichney, John Rogers, Joseph Quinn, Joseph  
568 S. Kass, Joy L. Taylor, Judith L. Heidebrink, Karen Anderson, Karen Blank, Karen Ekstam  
569 Smith, Karen L. Bell, Kathleen Johnson, Kathleen Tingus, Kathryn DeMarco, Kaycee M. Sink,  
570 Keith A. Johnson, Kelly M. Makino, Kenneth Spicer, Ki Won Nam, Kim Martin, Kim Poki-  
571 Walker, Kris Johnson, Kristin Fargher, Kristine Lipowski, Kyle Womack, Laura A. Flashman,  
572 Lawrence S. Honig, Liana Apostolova, Liberty Teodoro, Lisa C. Silbert, Lisa Ravdin, Lon S.  
573 Schneider, Lori A. Daiello, M. Saleem Ismail, Marc Seltzer, Marek-Marsel Mesulam, Maria

574 Carroll, Maria Kataki, Maria T. GreigCusto, Marissa Natelson Love, Mark A. Mintun, Martin  
575 R. Farlow, Martin Sadowski, Mary L. Creech, Mary L. Hynes, Mary Quiceno, MaryAnn  
576 Oakley, Mauricio Becerra, Megan Witbracht, Melanie Keltz, Melissa Lamar, Mia Yang,  
577 Michael Borrie, Michael Lin, Michele Assaly, Michelle Rainka, Mimi Dang, Mohammed O.  
578 Sheikh, Mrunalini Gaikwad, Munir Chowdhury, Nadira Trncic, Nancy Johnson, Nancy  
579 Kowalksi, Nathaniel Pacini, Neil Kowall, Neill R Graff-Radford, Norman Relkin, Ntekim E.  
580 Oyonumo, Nunzio Pomara, Olga James, Olu Ogunlana, Oscar L. Lopez, Owen Carmichael, P.  
581 Murali Doraiswamy, Parianne Fatica, Patricia Lynn Johnson, Patricia Samuels, Paul Malloy,  
582 Paula Ogrocki, Pauline Maillard, Peter Hardy, Pierre Tariot, Po H. Lu, Pradeep Varma,  
583 Rachelle S. Doody, Raina Carter, Raj C. Shah, Randall Griffith, Randy Yeh, Ranjan Duara,  
584 Rawan Tarawneh, Raymond Scott Turner, Raymundo Hernando, Reisa A., Richard E. Carson,  
585 Riham El Khouli, Robert B. Santulli, Ronald Killiany, Rosemarie Rodriguez, Russell H.  
586 Swerdlow, Salvador Borges-Neto, Sandra Black, Sandra Weintraub, Sanjay Asthana, Sanjeev  
587 Vaishnavi, Sara Dolen, Sara S. Mason, Scott Herring, Sherye A. Sirrel, Smita Kittur, Sonia  
588 Pawluczyk, Stacy Schneider, Stephanie Kielb, Stephanie Reeder, Stephen Correia, Stephen  
589 Pasternack, Stephen Pasternak, Stephen Salloway, Sterling Johnson, Steven Chao, Steven E.  
590 Arnold, Susan K. Schultz, Susan Rountree, T-Y Lee, Terence Z. Wong, Teresa Villena,  
591 Thomas O. Obisesan, Valory Pavlik, Vernice Bates, Vesna Sossi, Victoria Shibley, William  
592 M. Brooks, William Pavlosky, Yaakov Stern

593

## 594 **Biomarkers Consortium Project Team Members**

595

596 Adam Simon, Ashok Dongre, Bob Dean, Brad Navia, Dan Spellman, David Lee, David Shera,  
597 Eric Siemers, Eve Pickering, Frank Swenson, Fred Immerman, George Nomikos, Holly Soares,  
598 Hong Wan, Jeff Seeburger, Jeff Waring, John Trojanowski, Judy Siuciak, Kevin Duffin, Les  
599 Shaw, Li-San Wang, Madhav Thambisetty, Marc Walton, Mary Savage, Mats Ferm, Max  
600 Kuhn, Neil Buckholtz, Panos Zagouras, Patricia Cole, Ron Hendrickson, Sharon Xie, Sophie  
601 Allauzen, Walter Koroshetz, William Potter
